# Supplementary material for: Facile TEMPO Immobilization onto Poly(acrylic acid)-Modified Magnetic Nanoparticles: Preparation and Property
Source: Hindawi journal article supplement (doi:10.1155/2017/9621635), 2017-01-01
Supplement: f1 [file 9621635.f1.doc]

**Supporting Information**

# GC spectroscopy Results


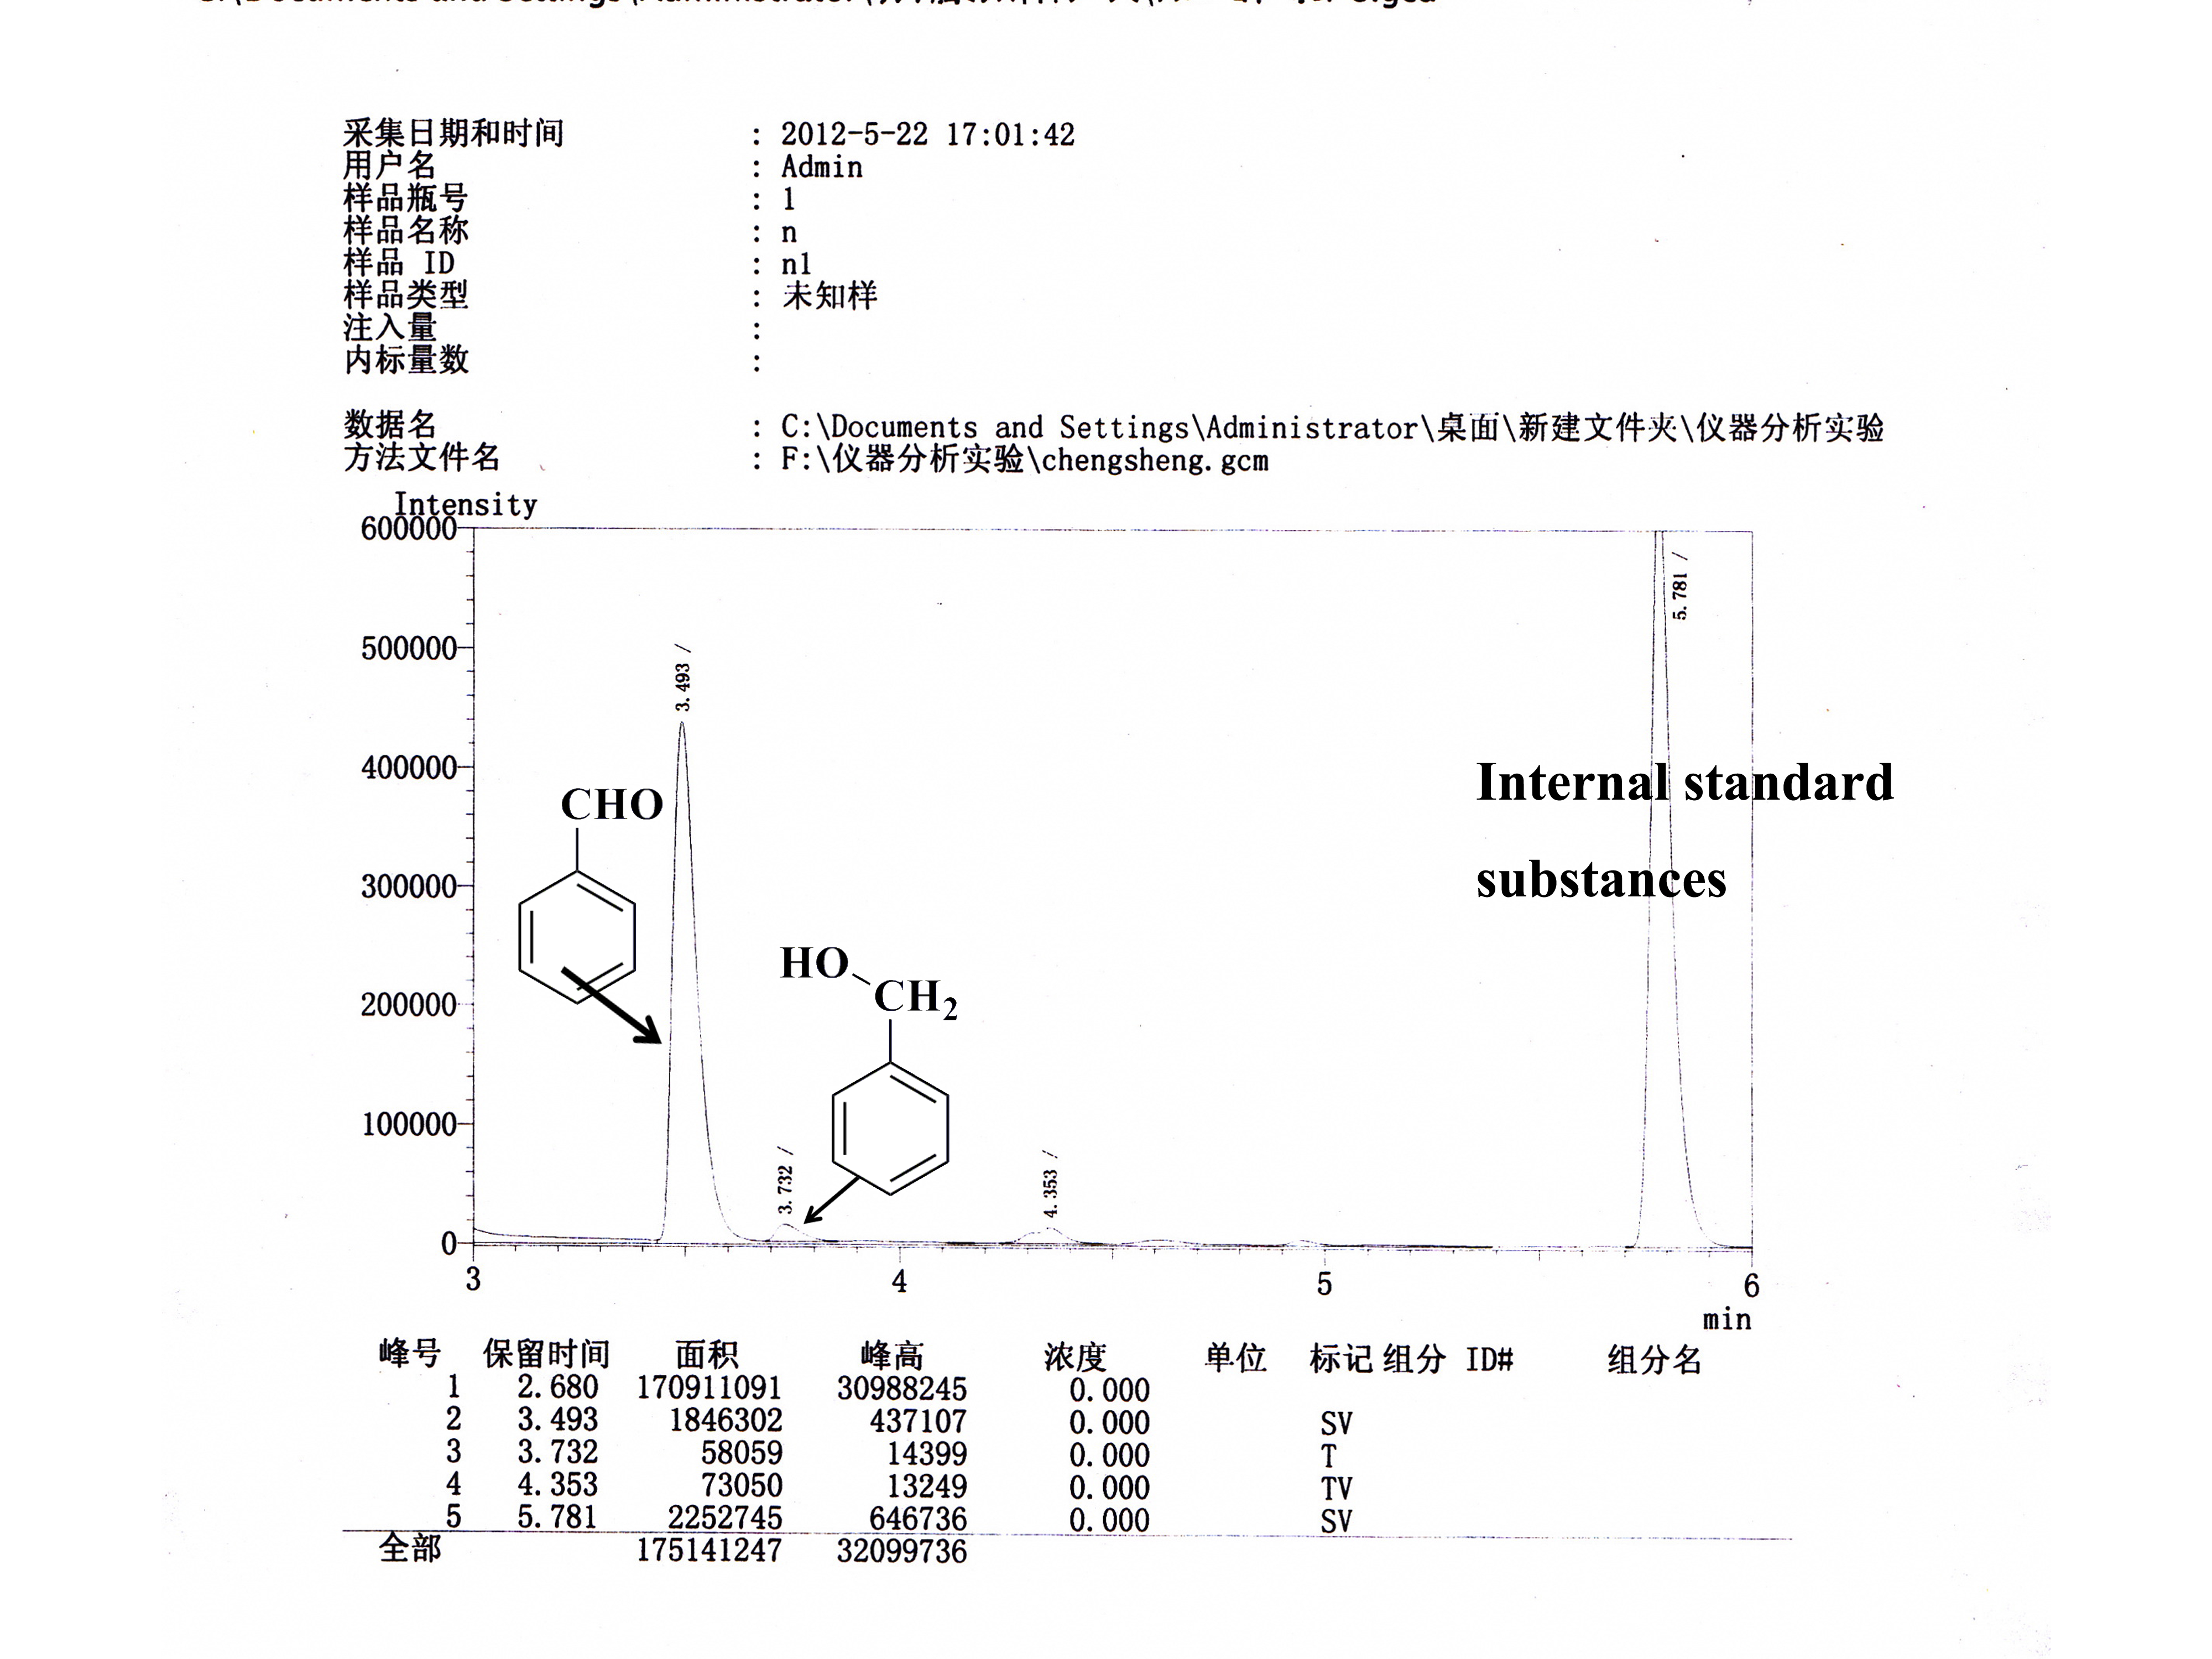

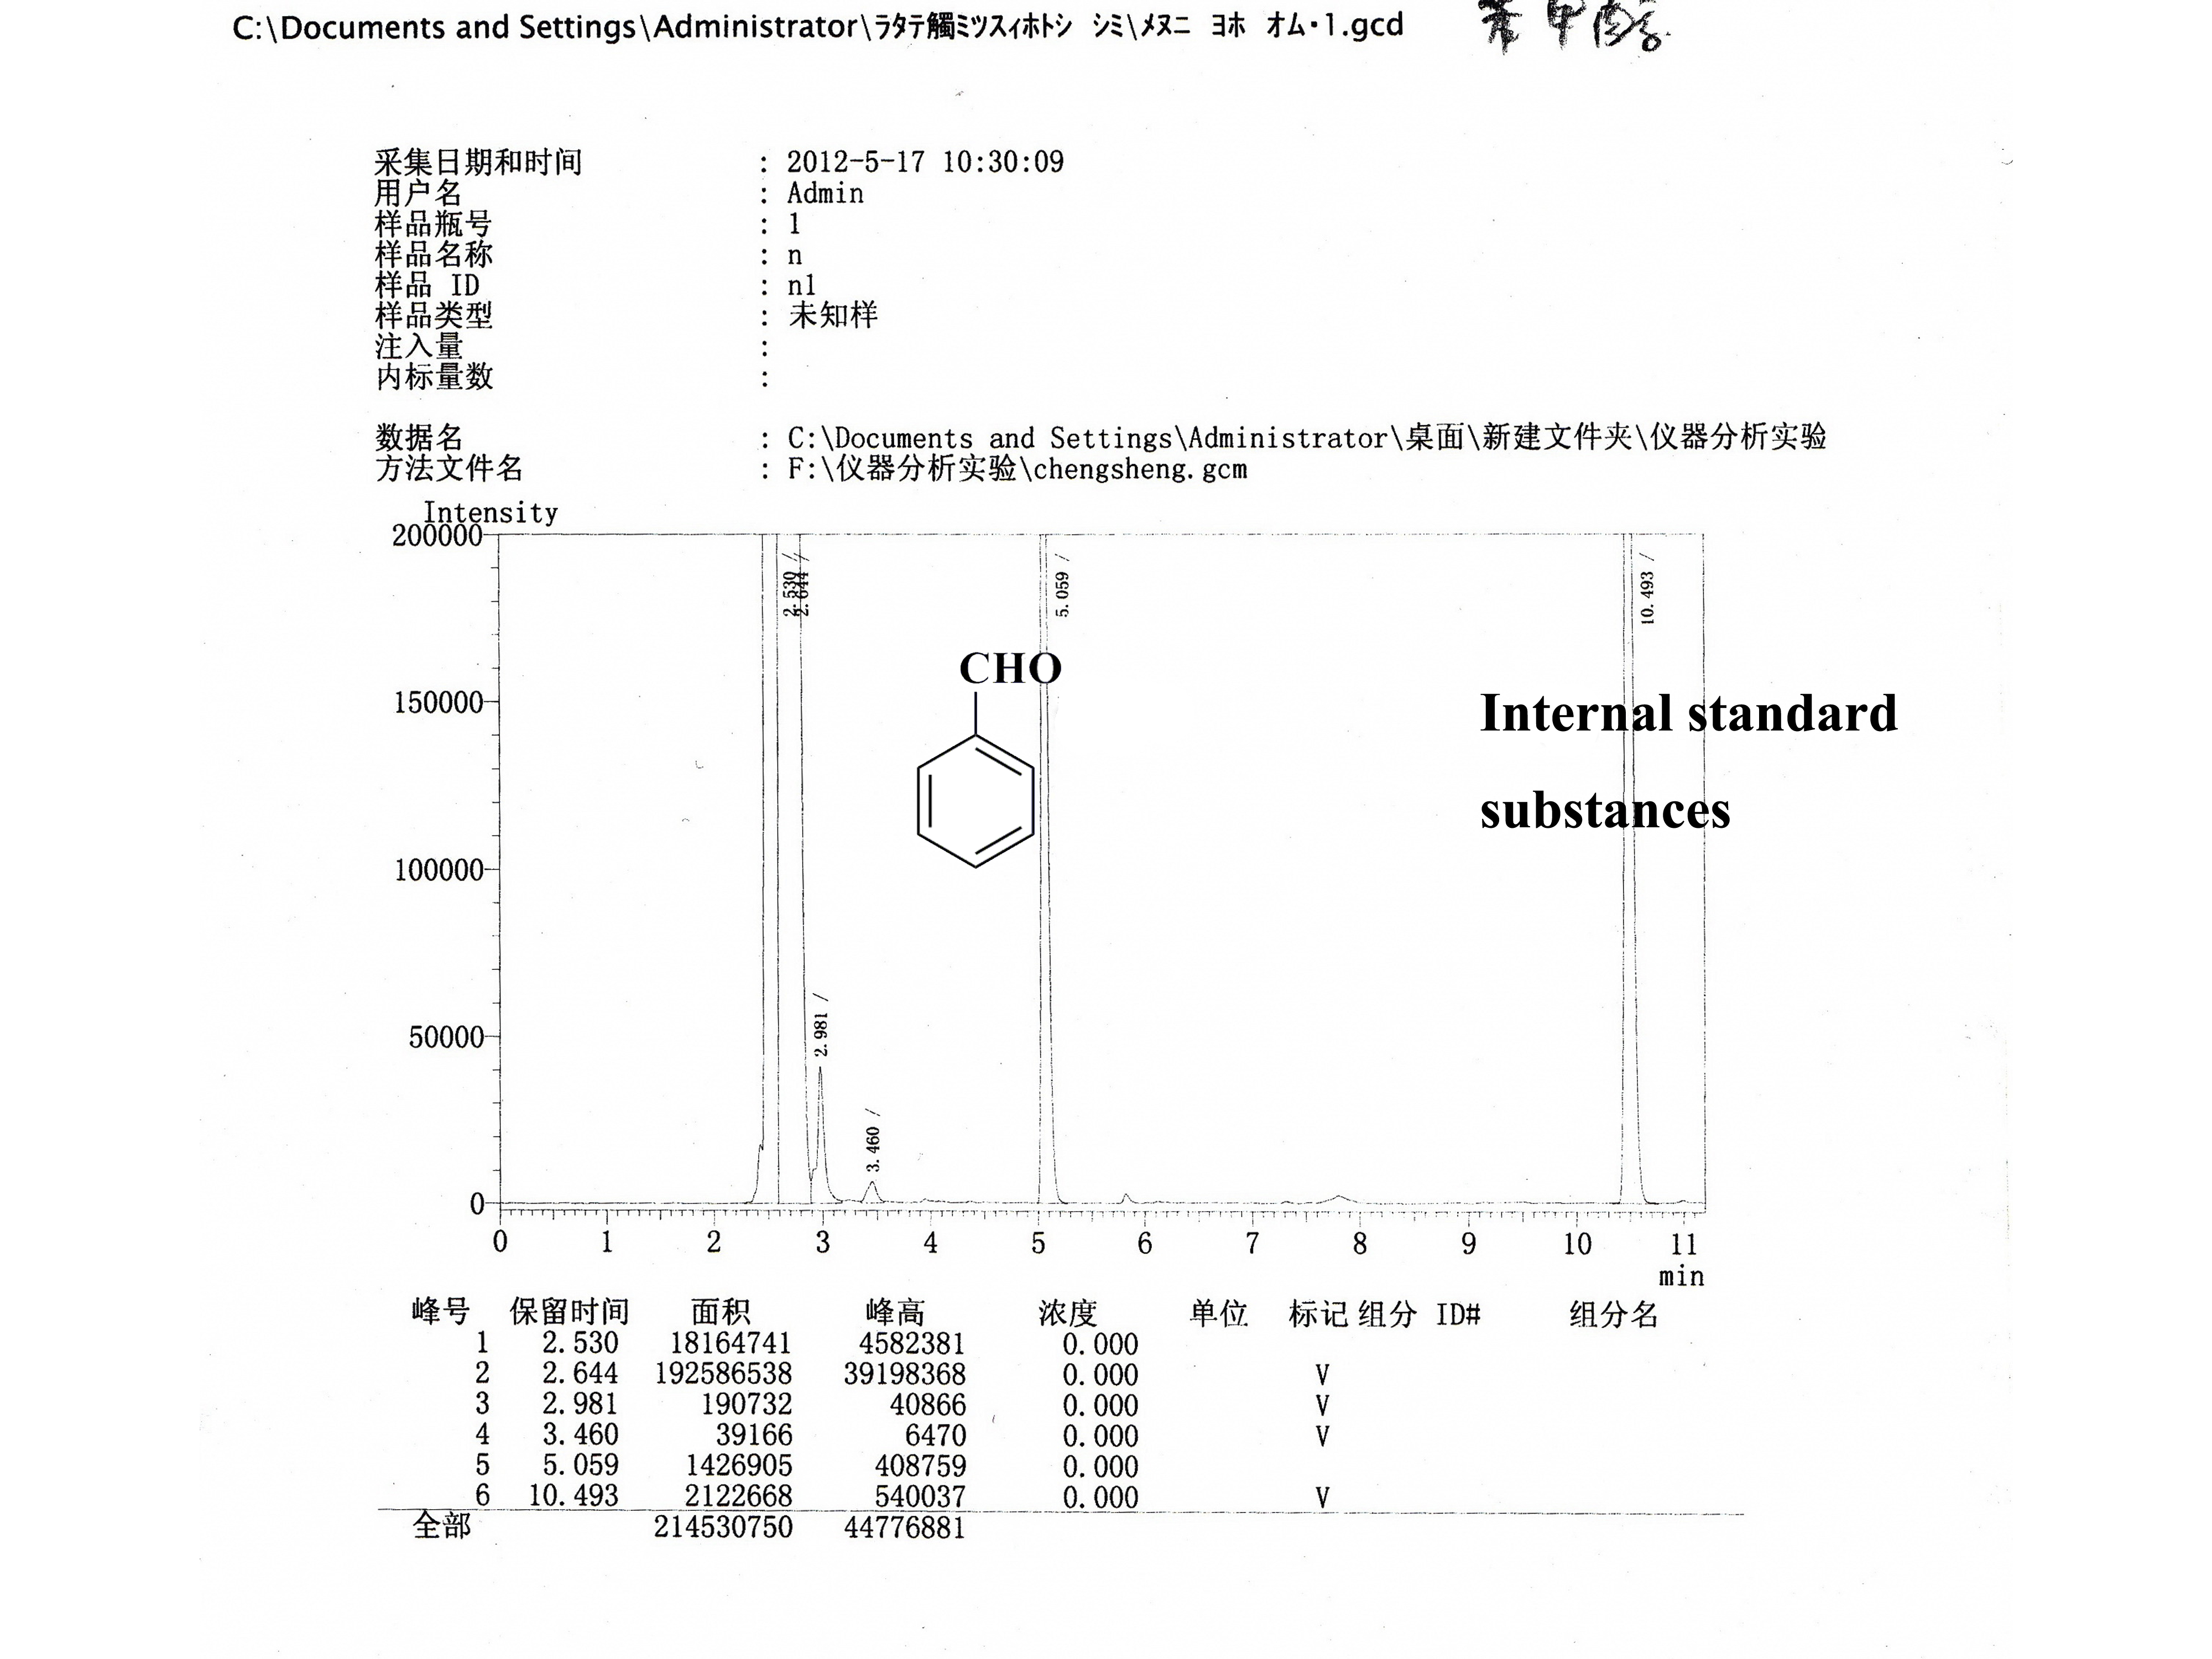


Fig-S1 GC analysis of benzyl alcohol oxidation: Minisci method(left), Anelli method(right)


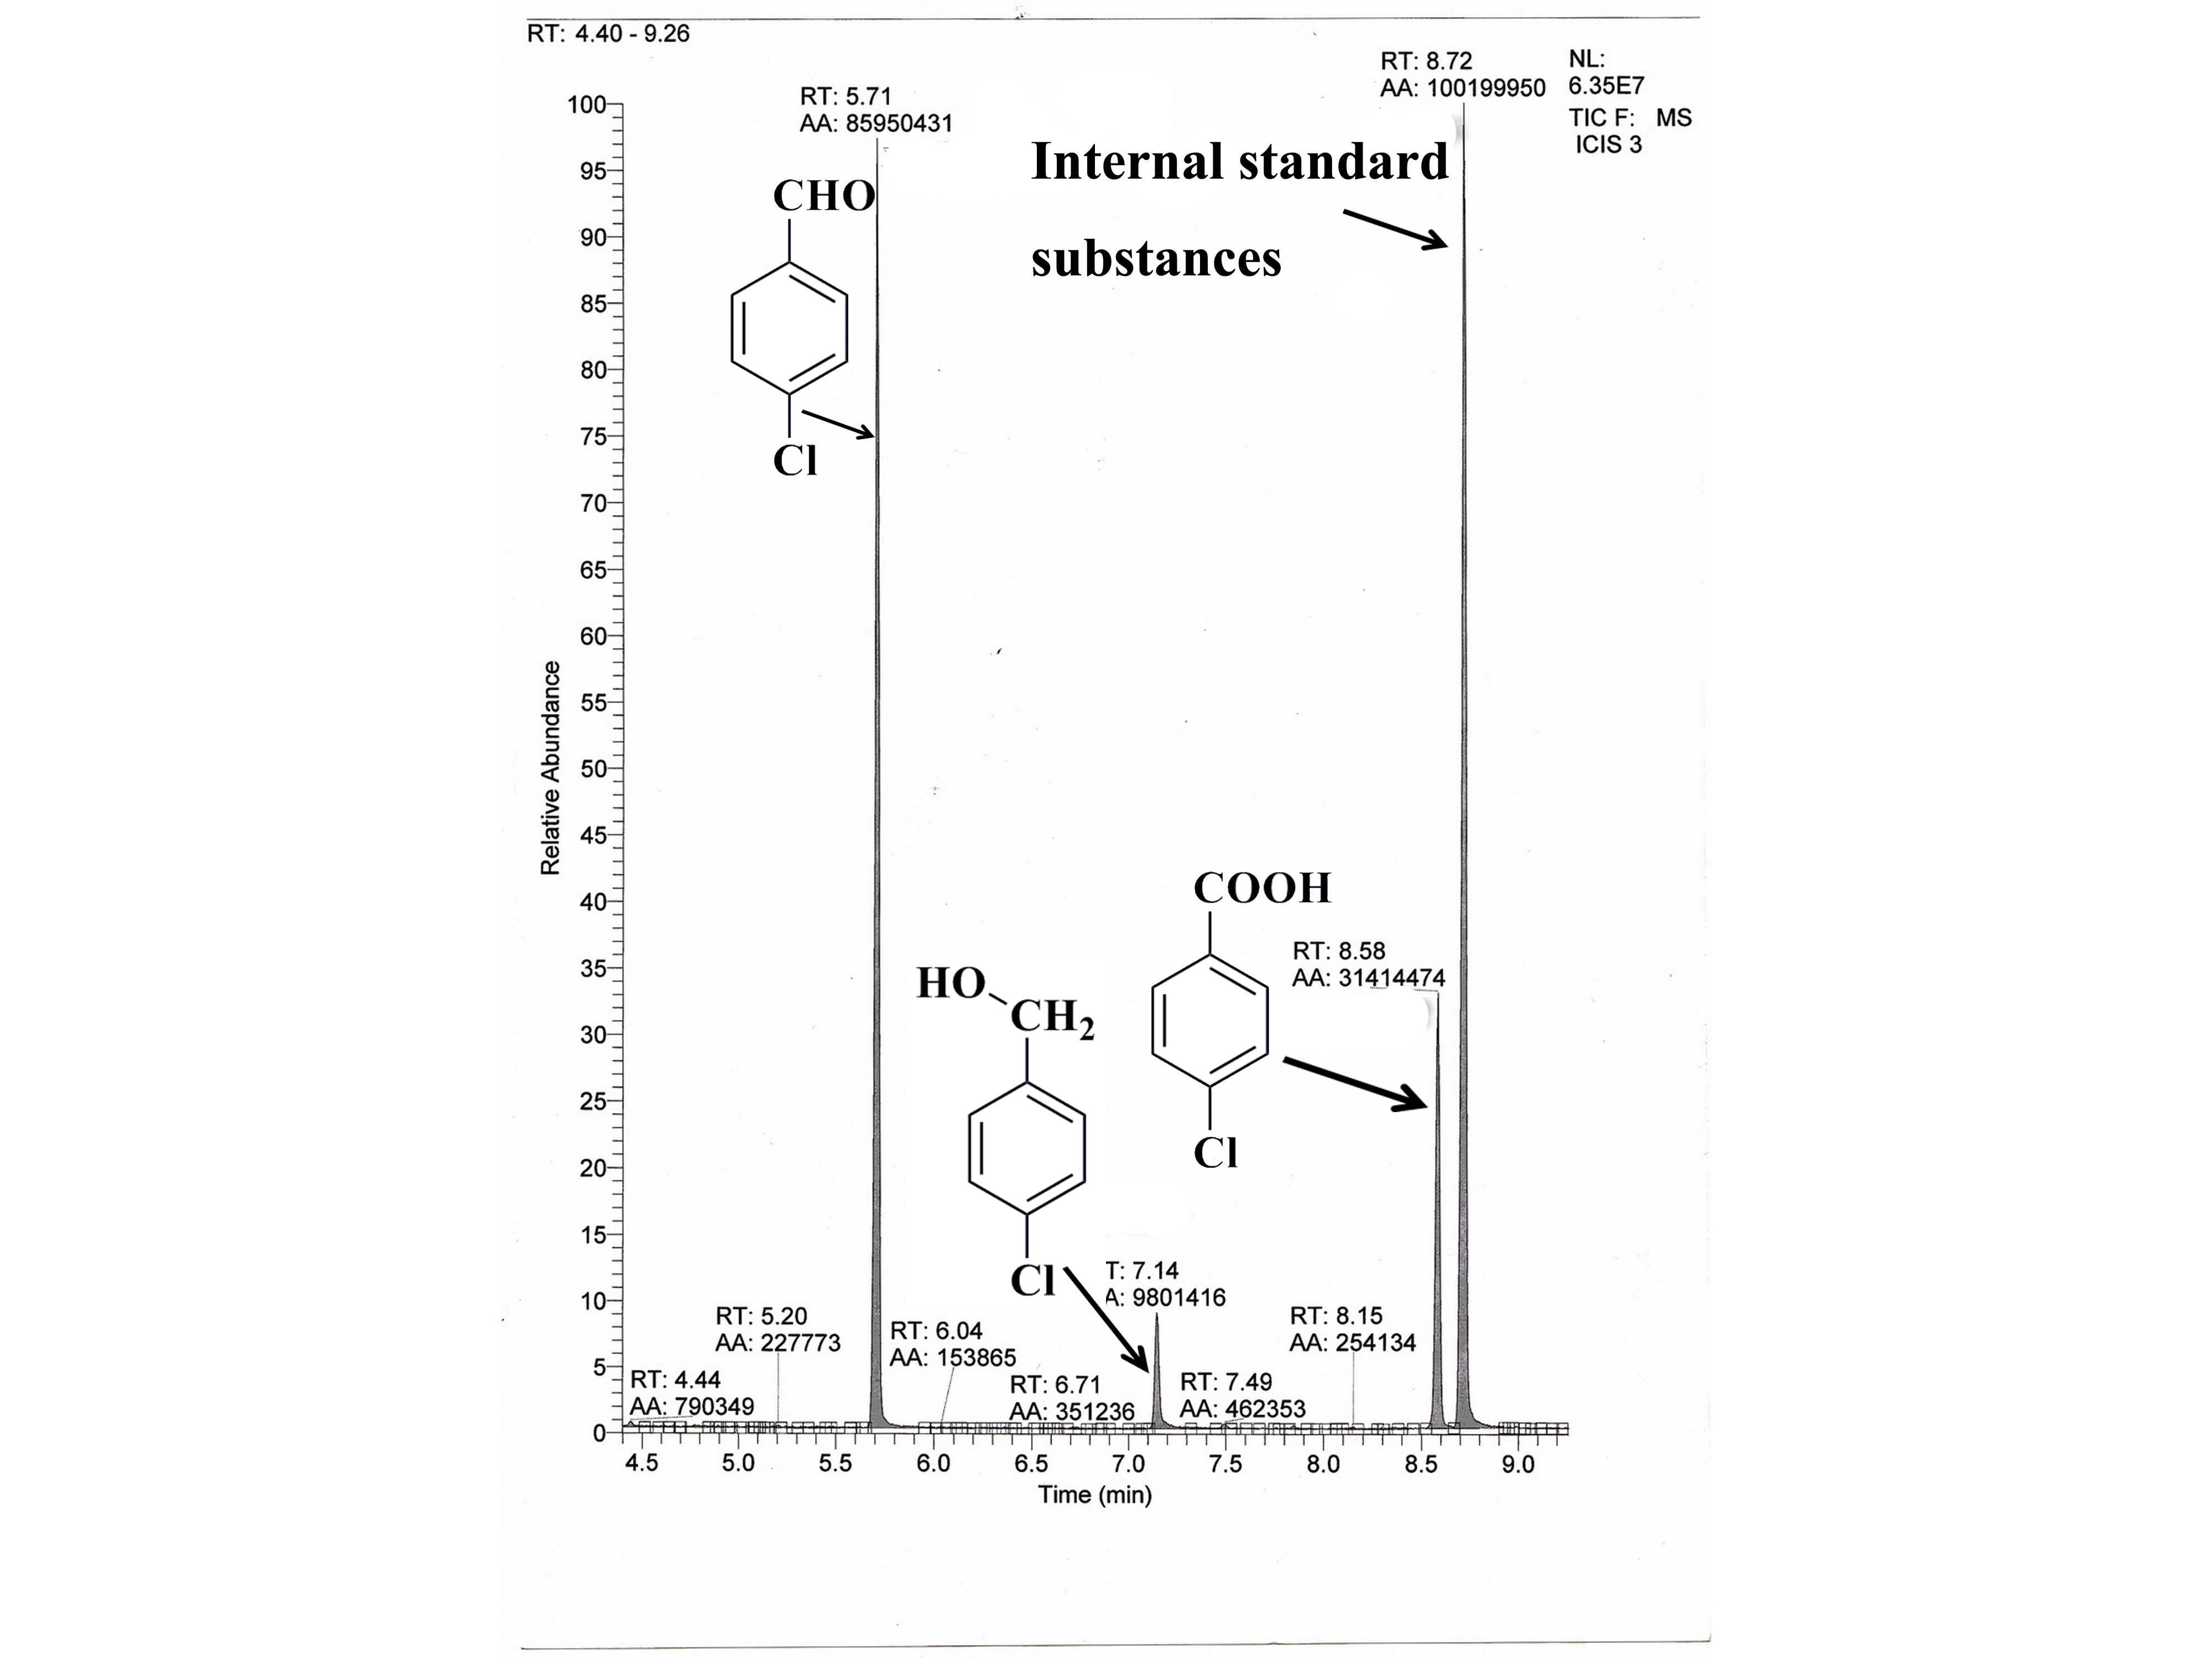

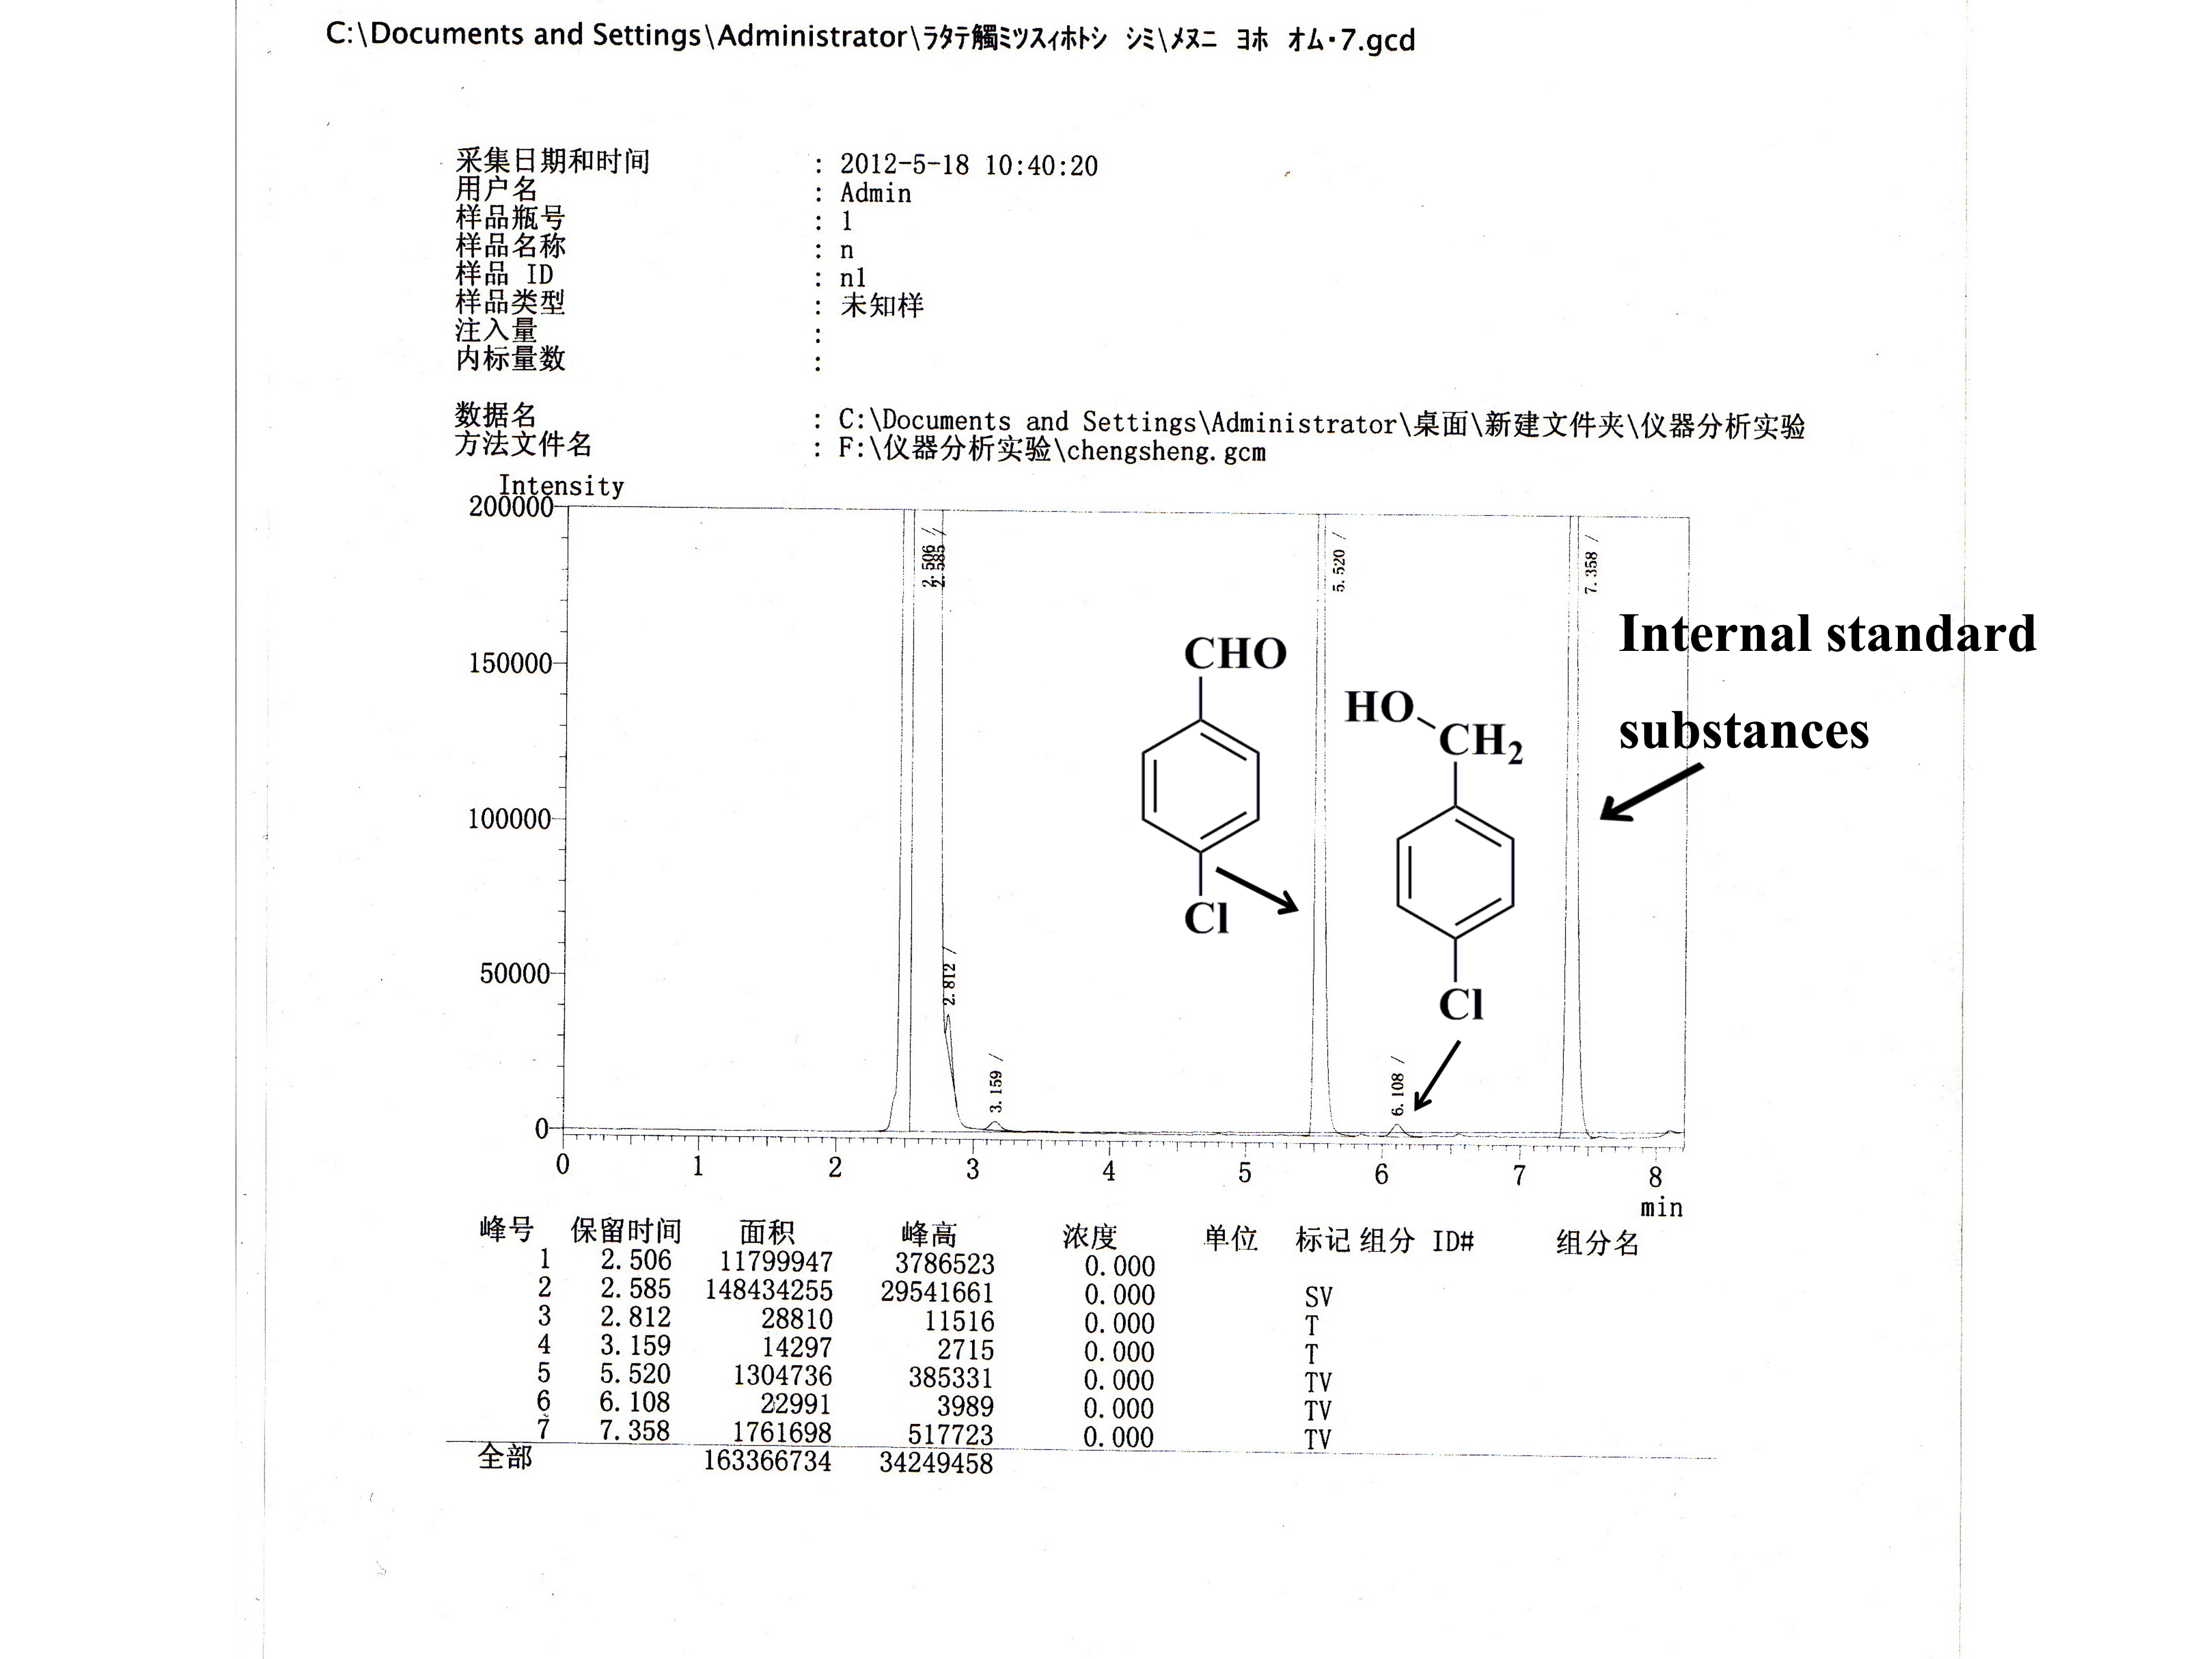


Fig-2 GC analysis of p-chloro benzyl alcohol oxidation: Minisci method(left), Anelli method(right)


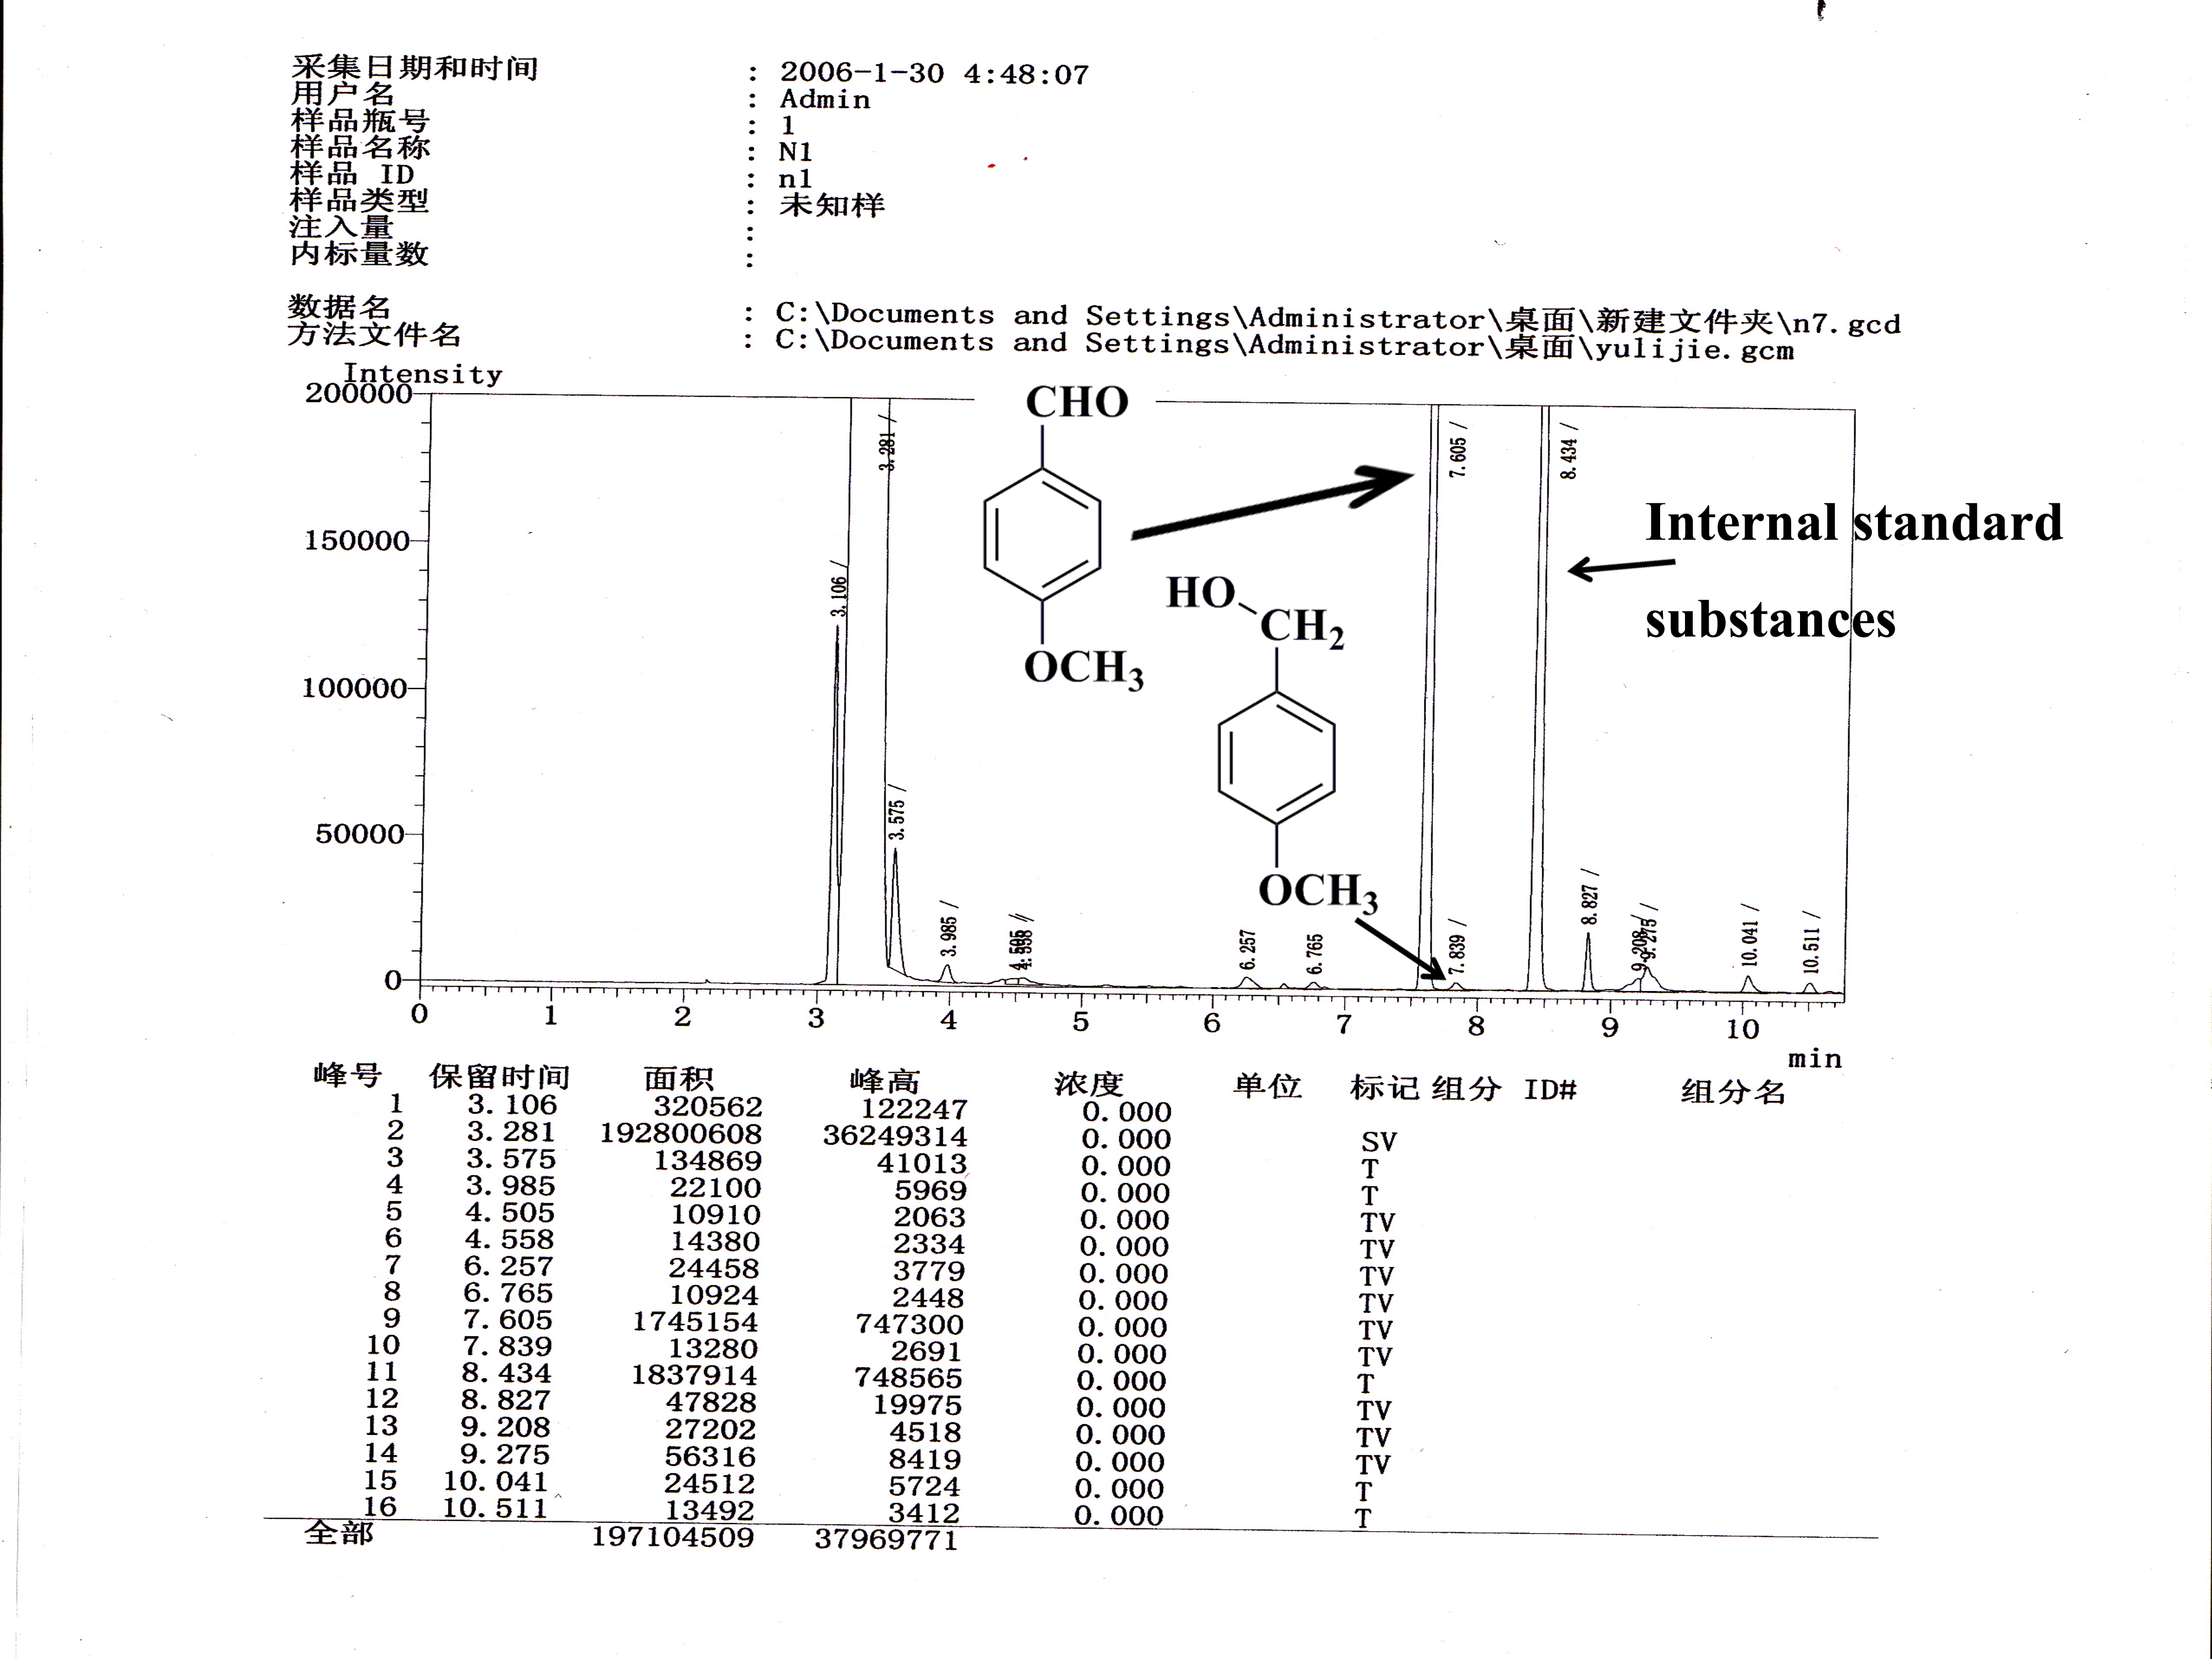

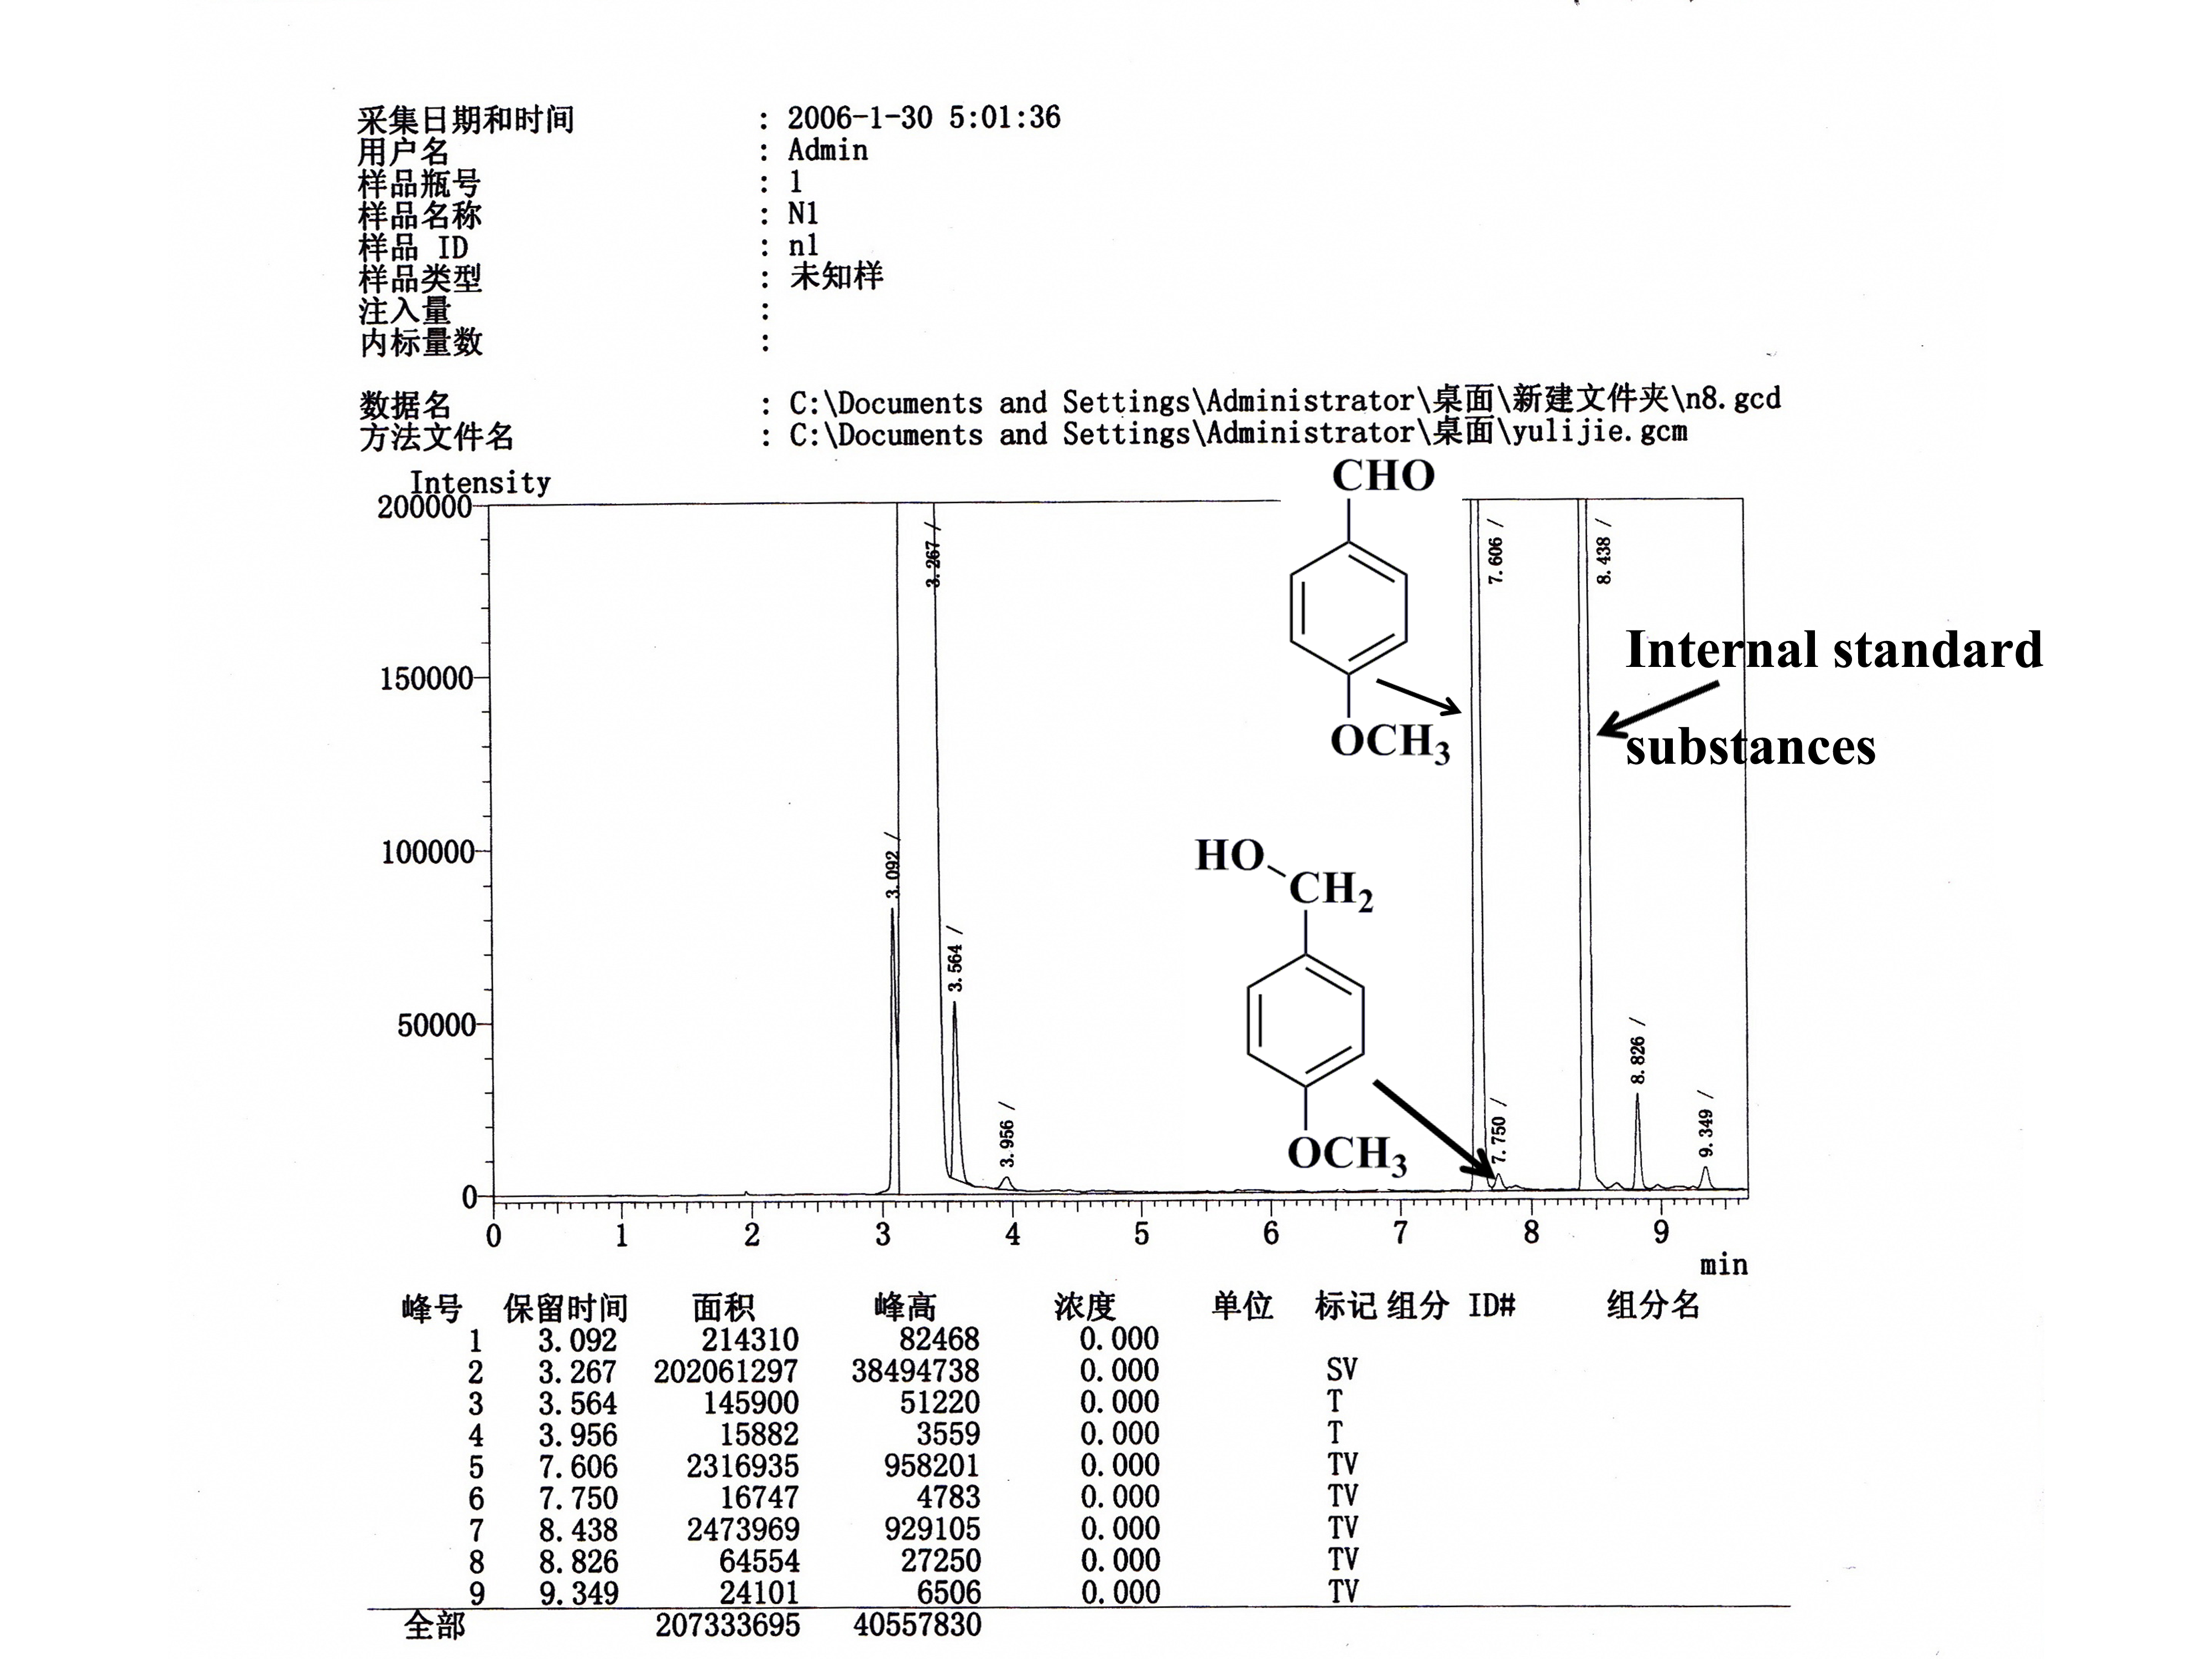


Fig-3 GC analysis of 4-Methoxybenzyl alcoholl oxidation: Minisci method(right), Anelli method(left)


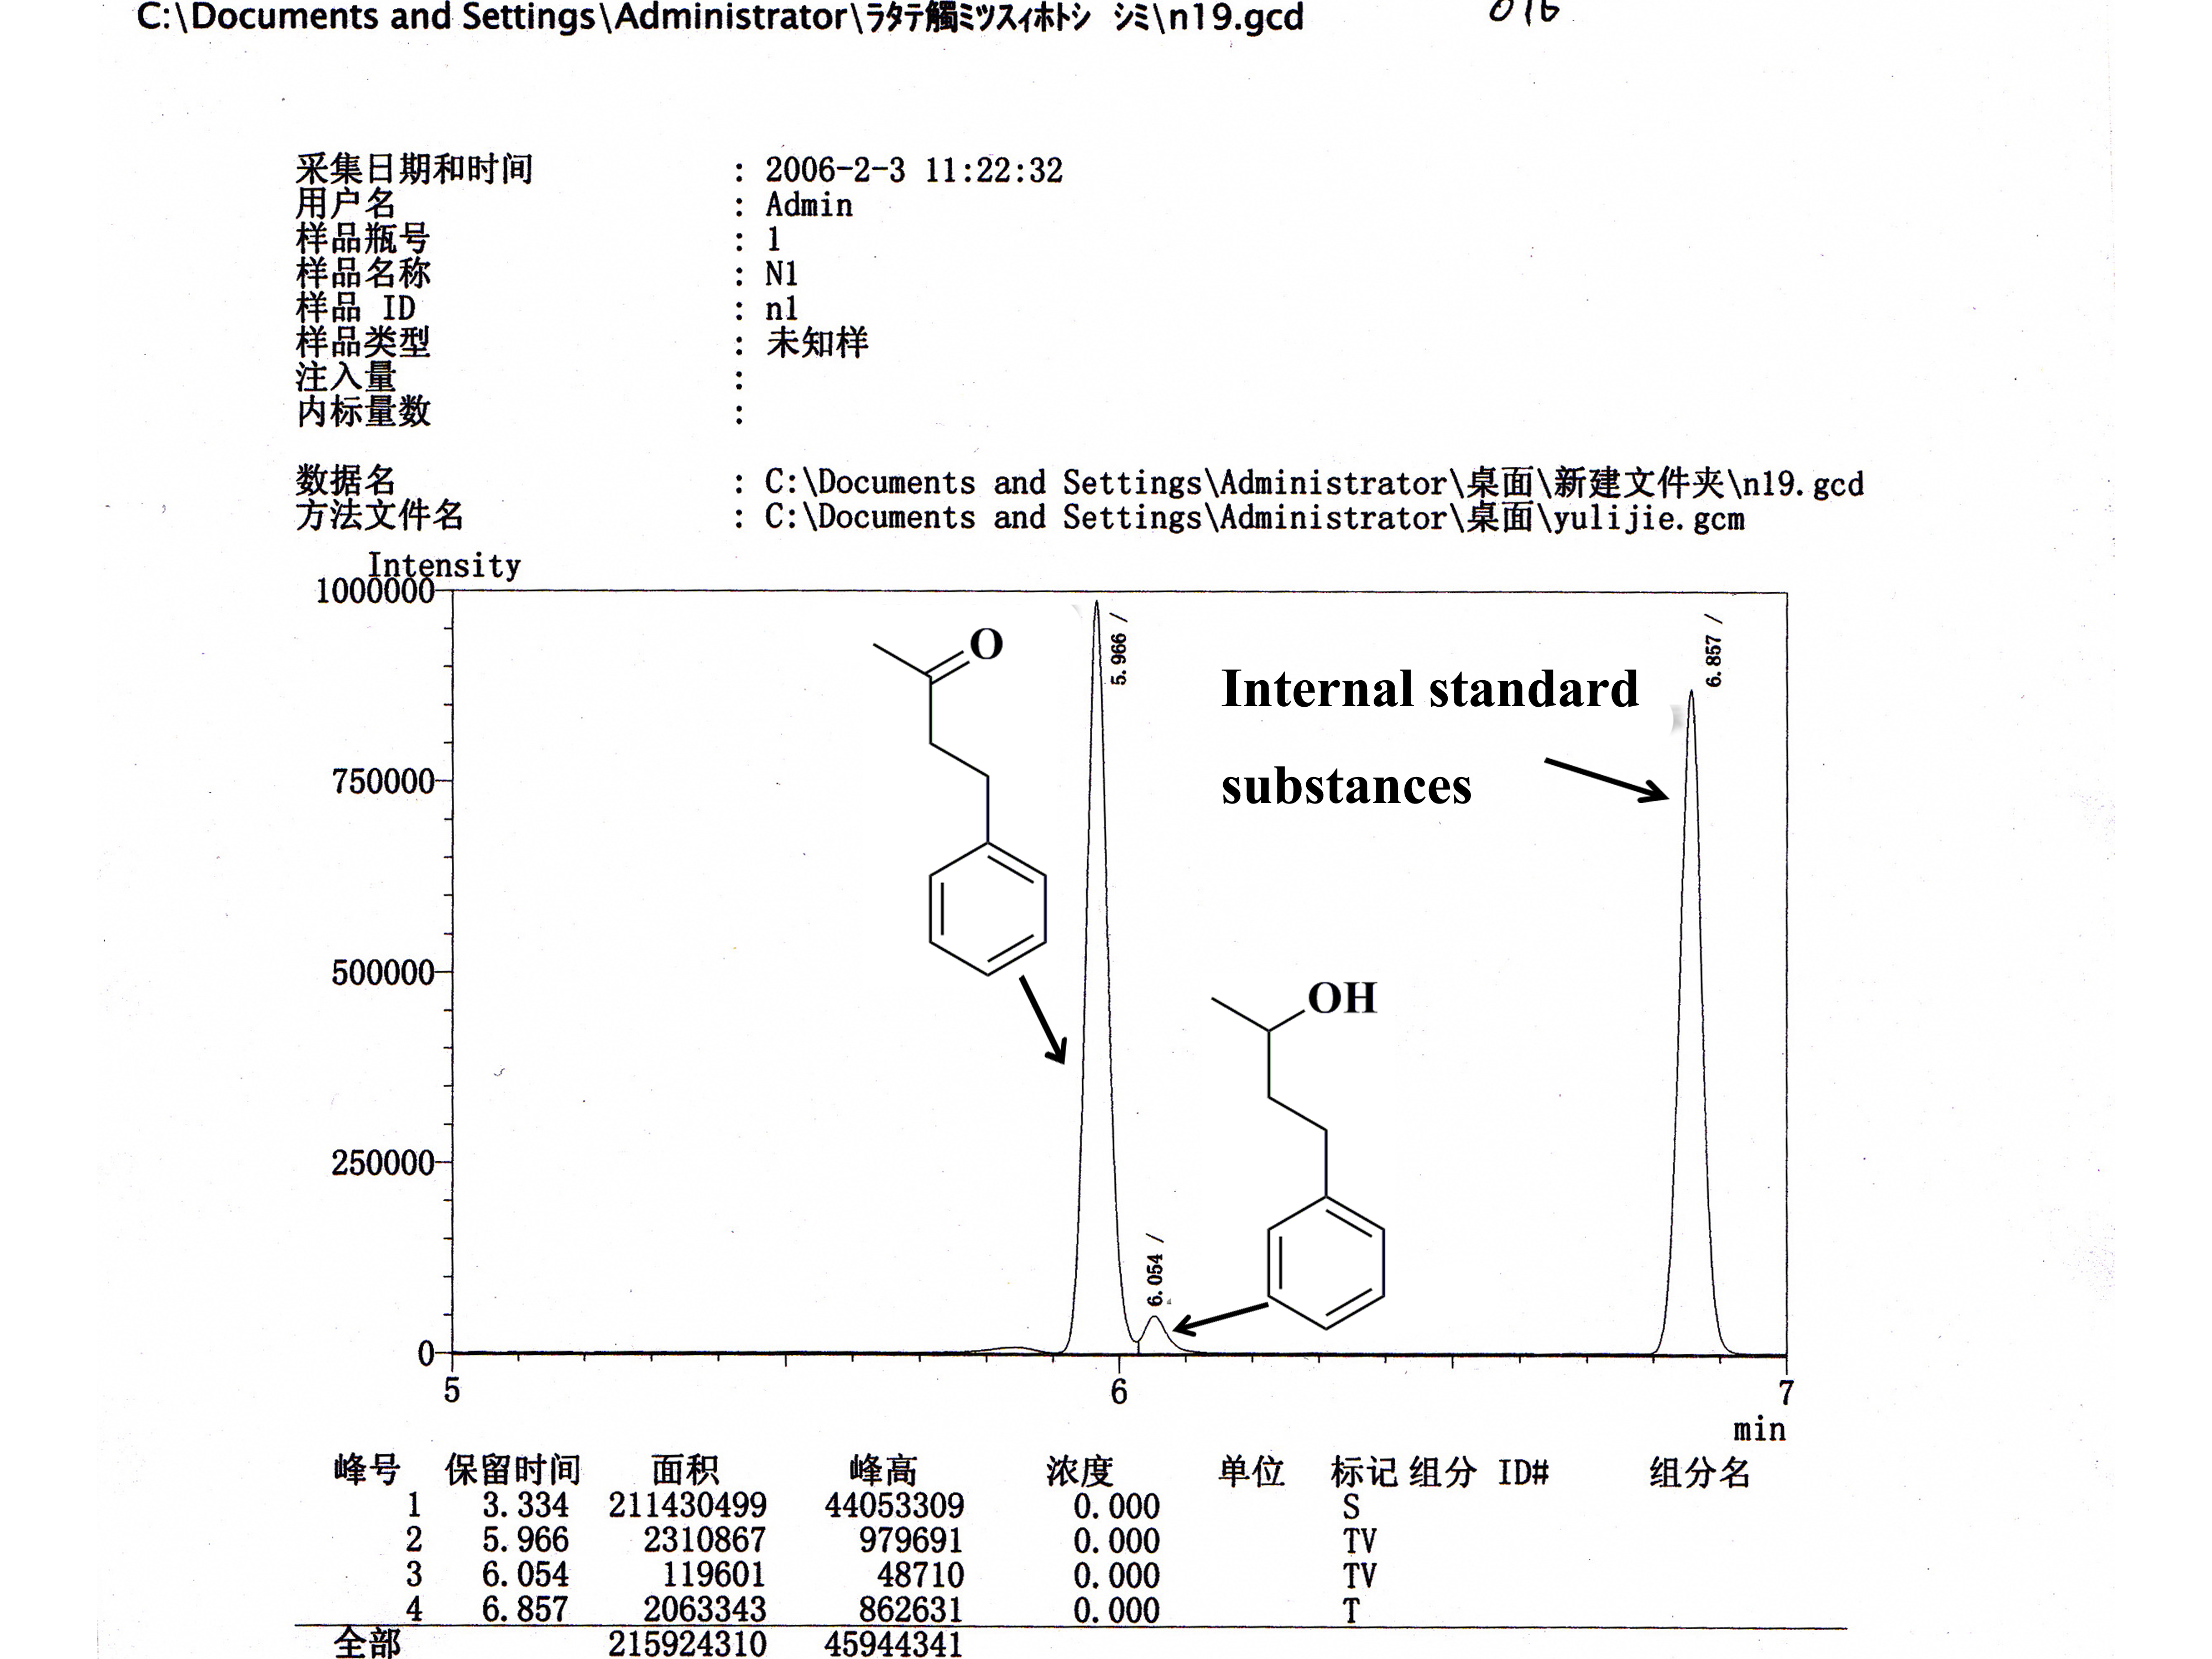


Fig-4 GC analysis of 4-Phenyl-2-butanol oxidation: Anelli method


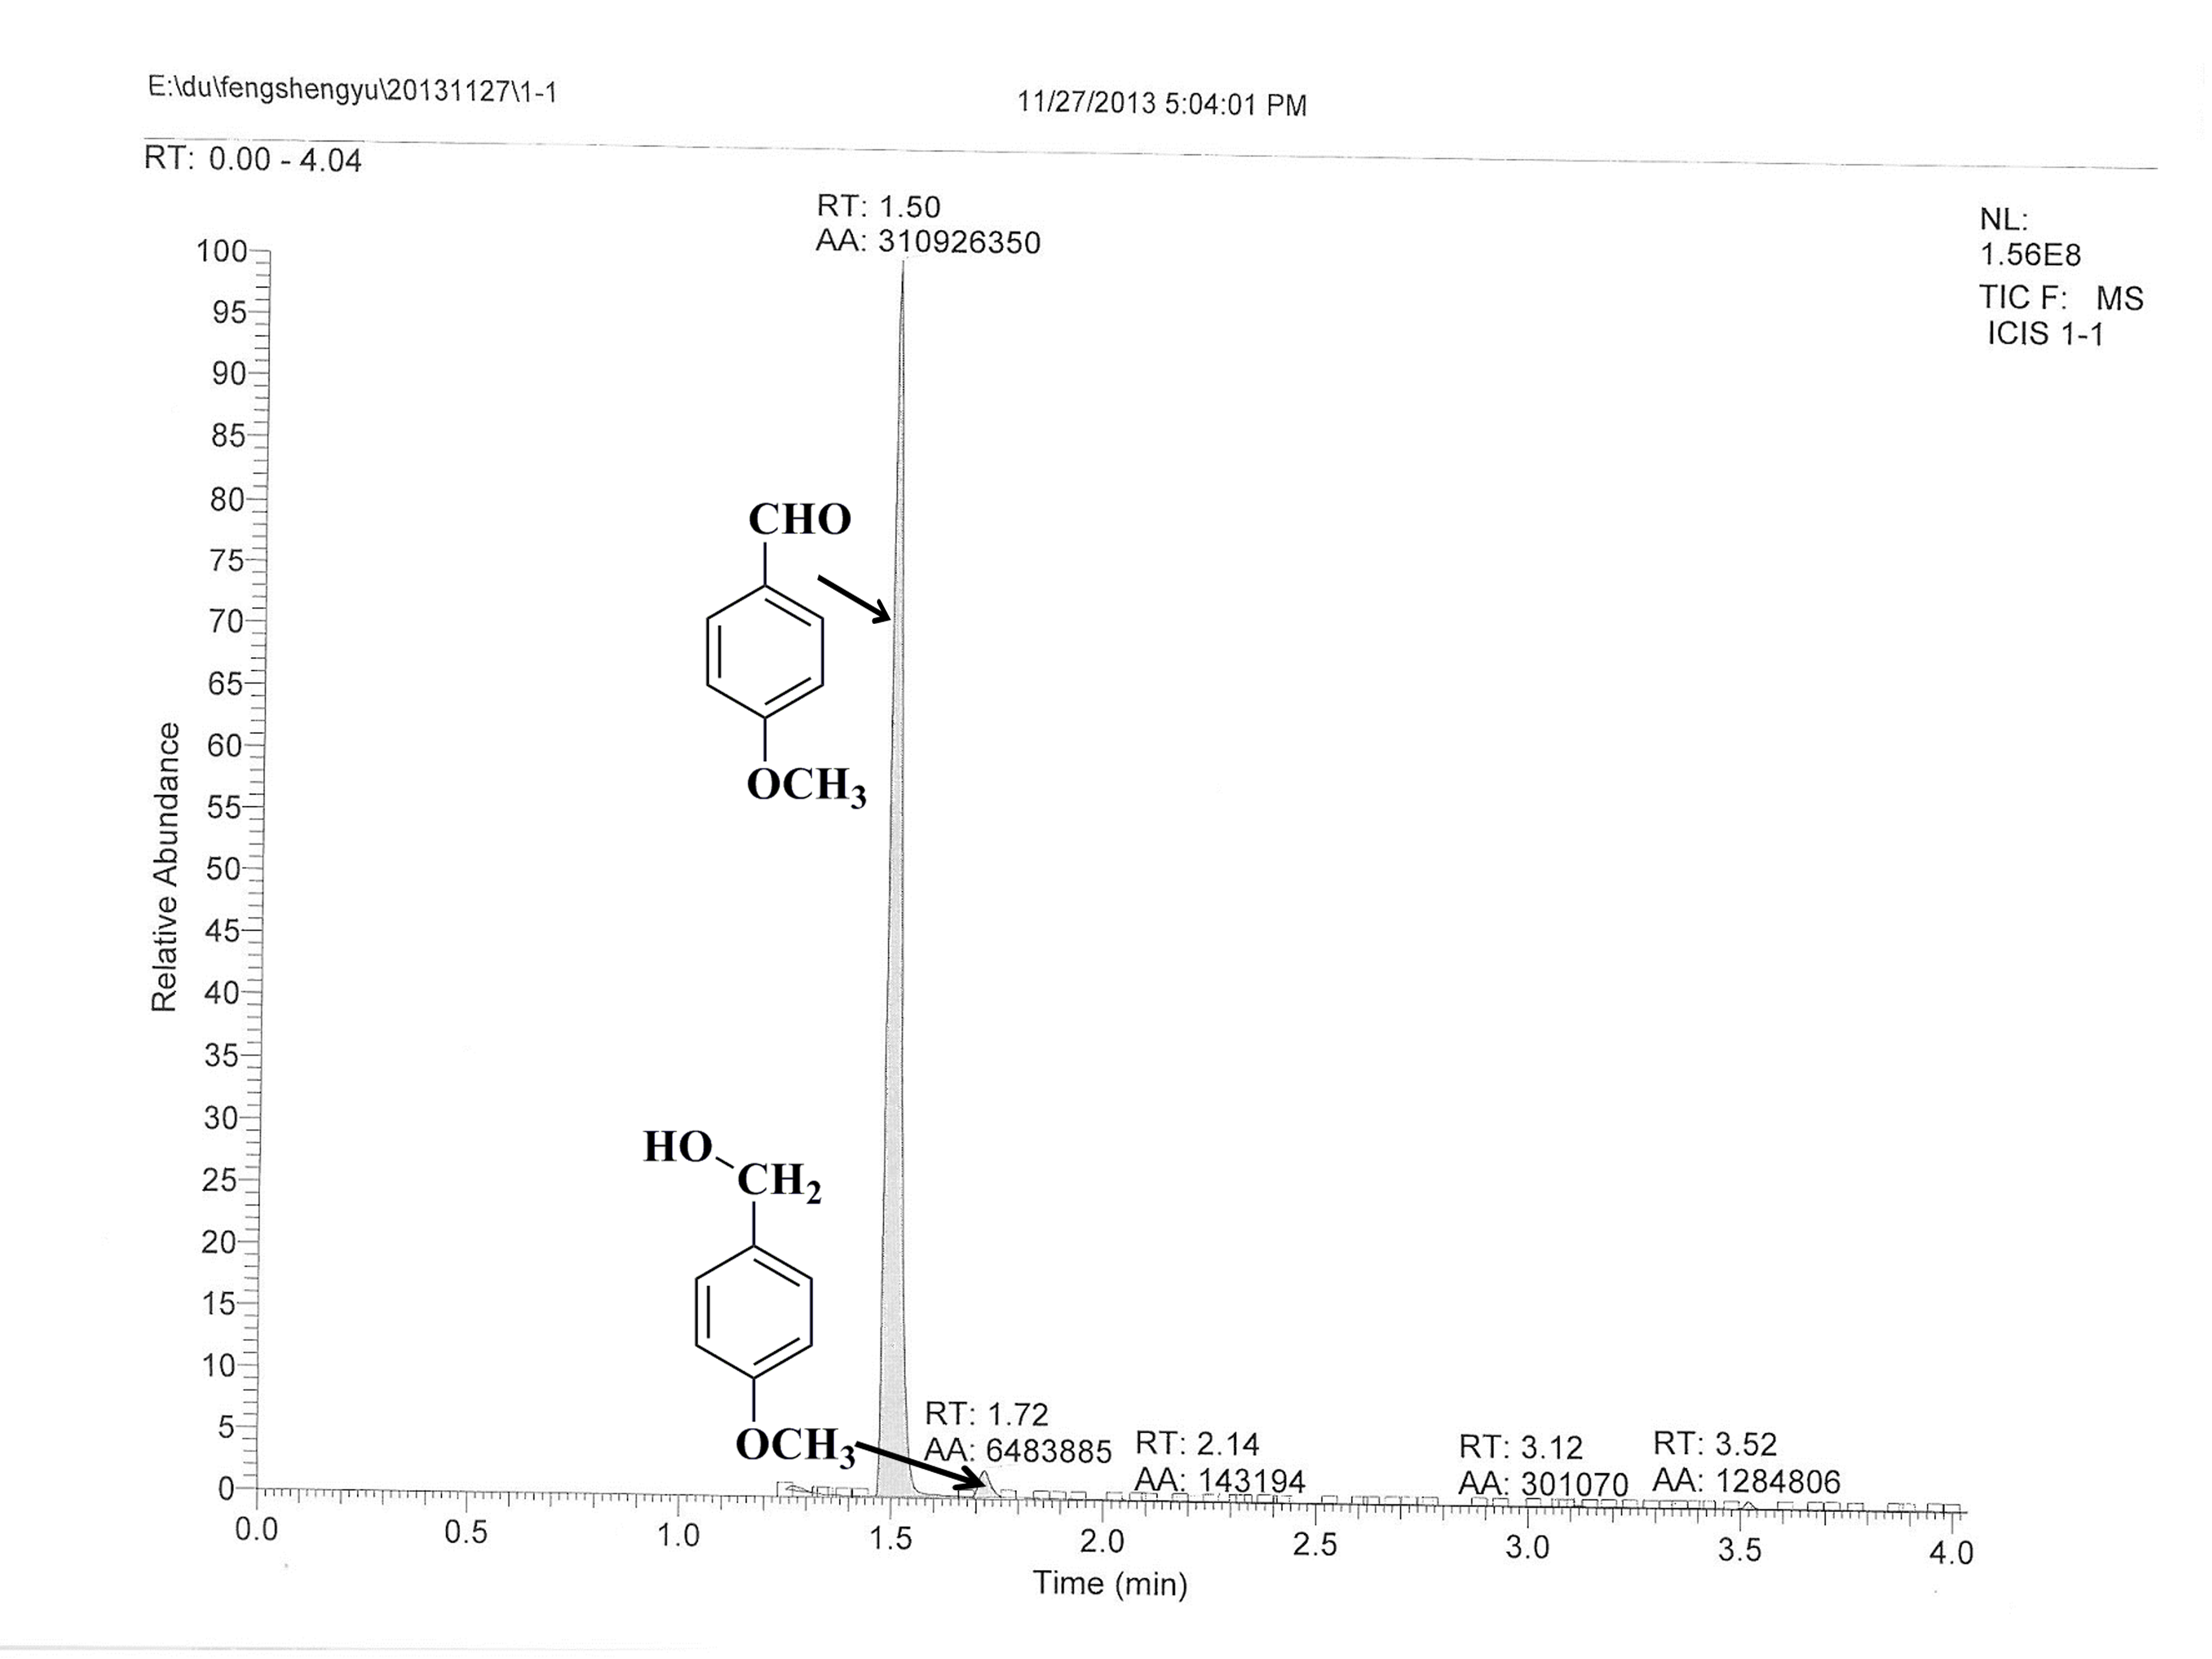

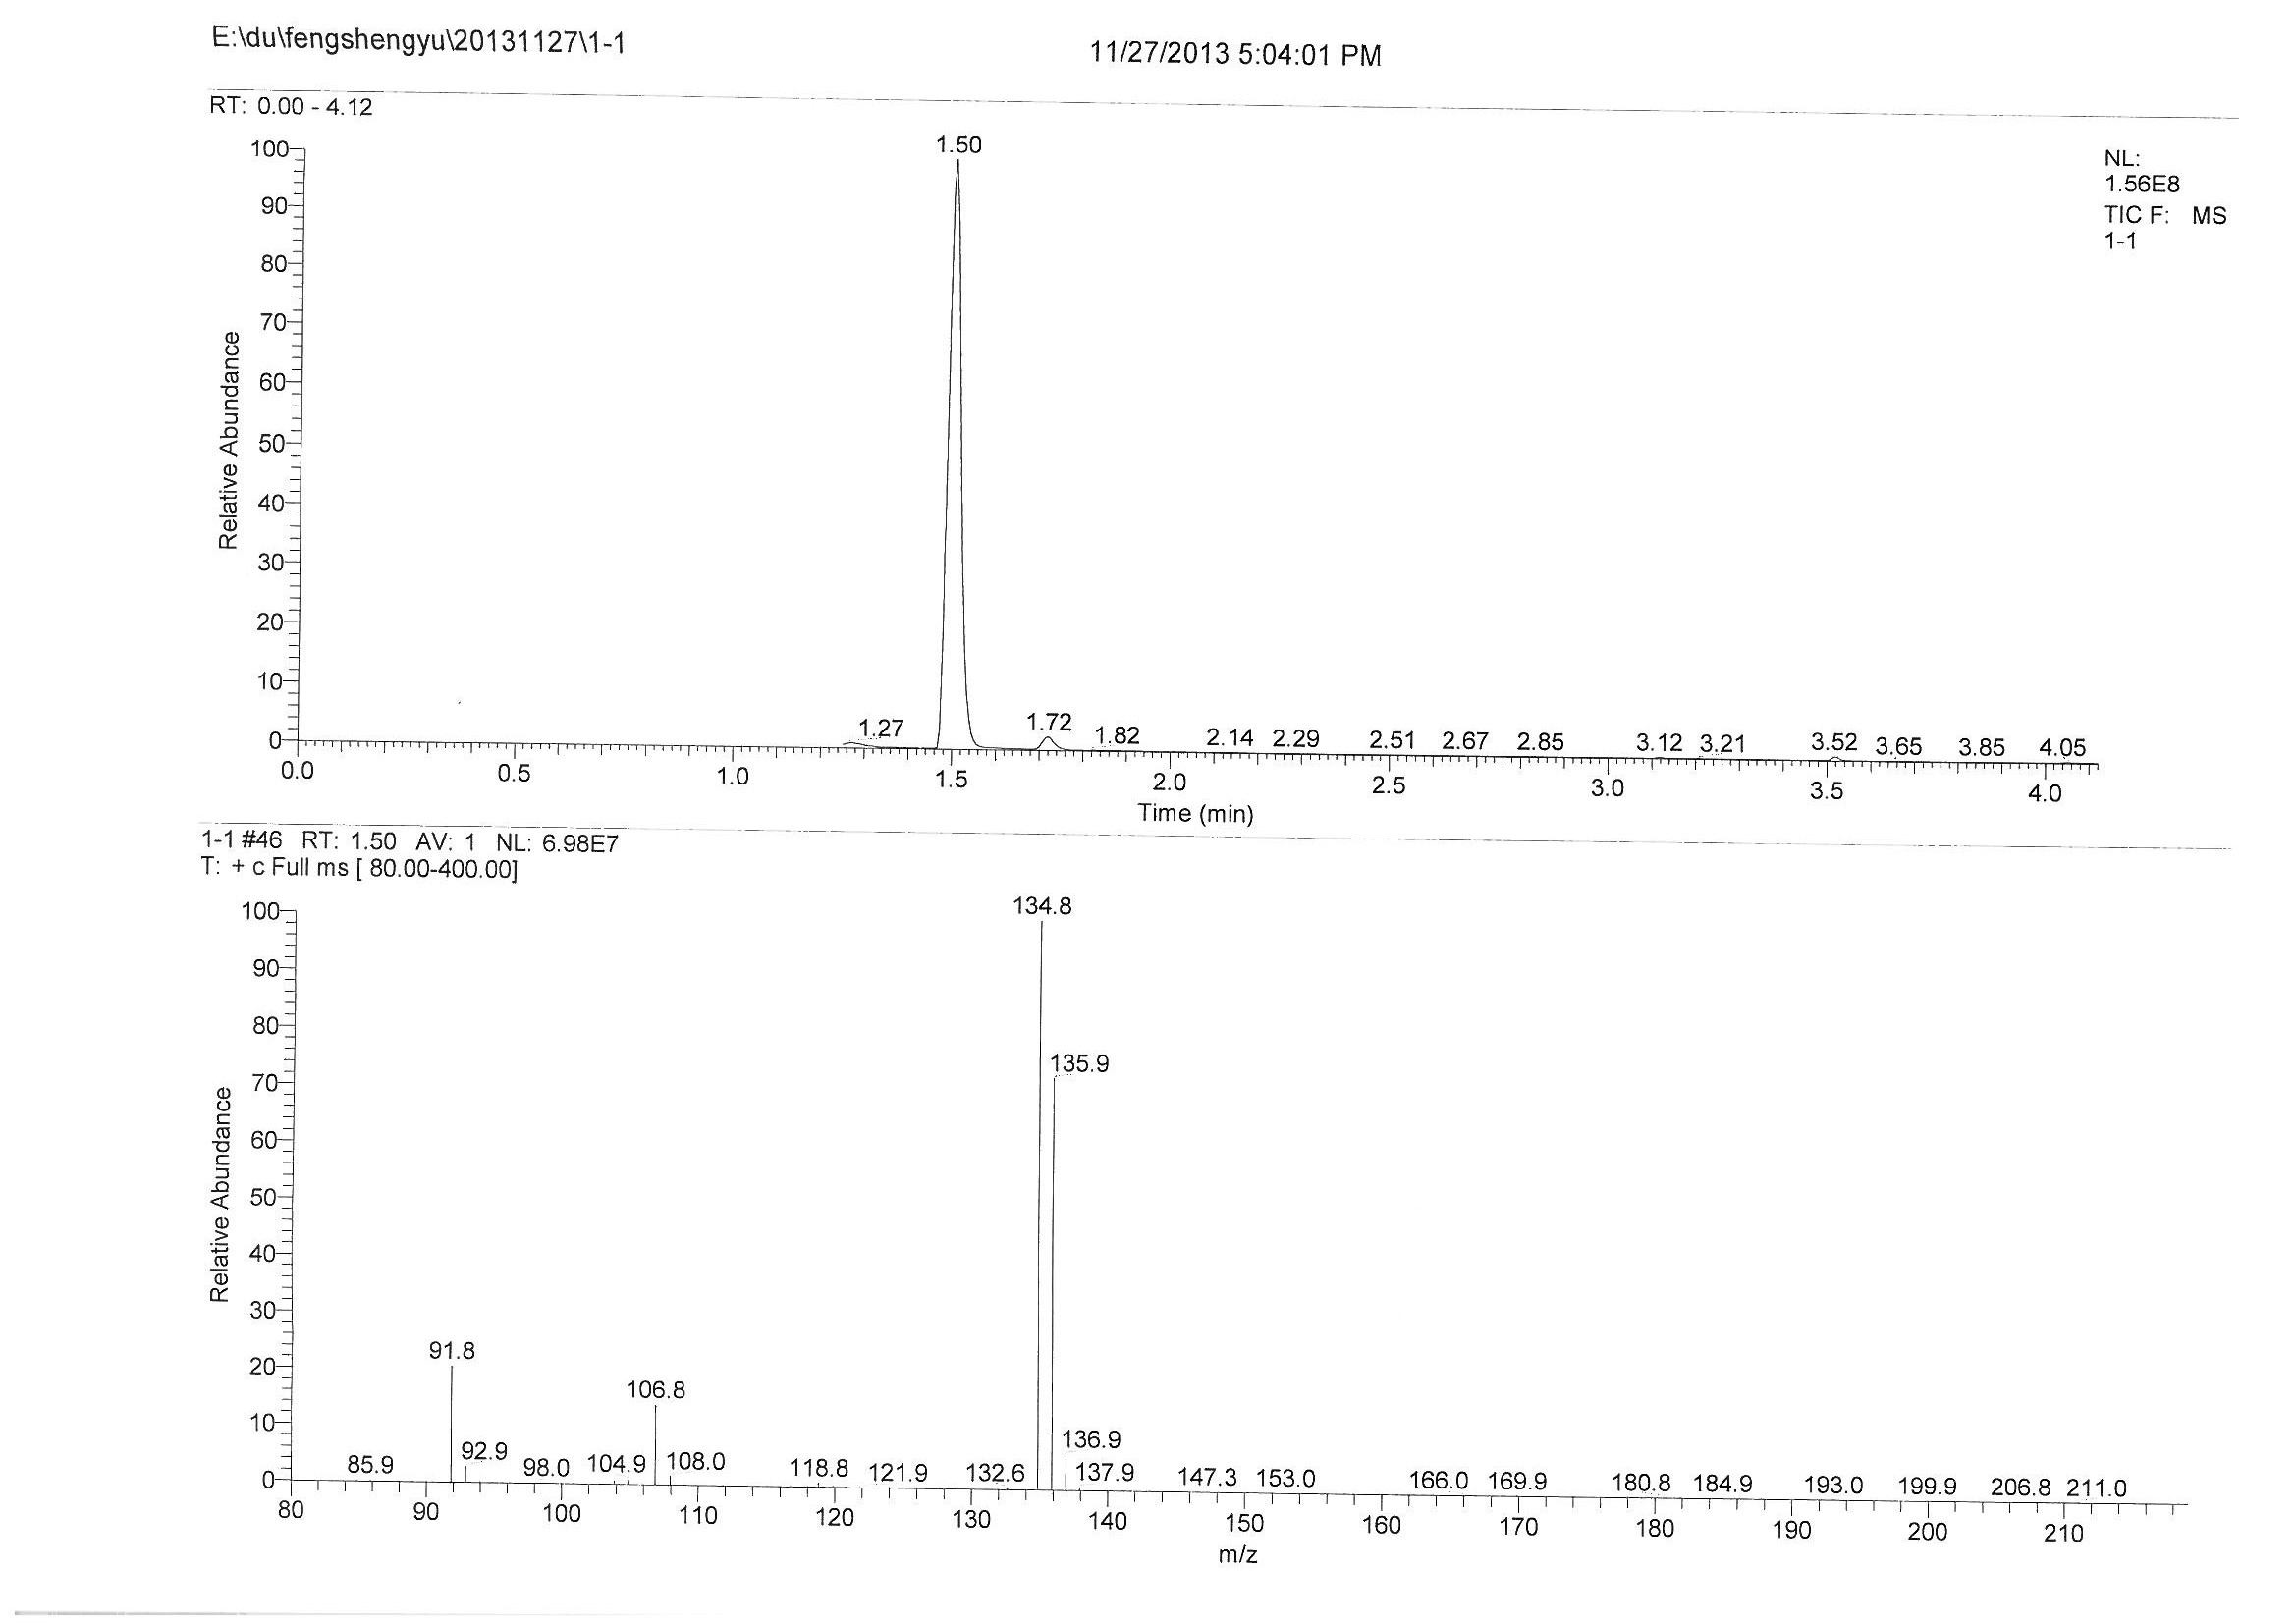


Fig-5 GC-MS analysis of 4-Methoxybenzyl alcohol Minisci method oxidation: (FIRST RUN)


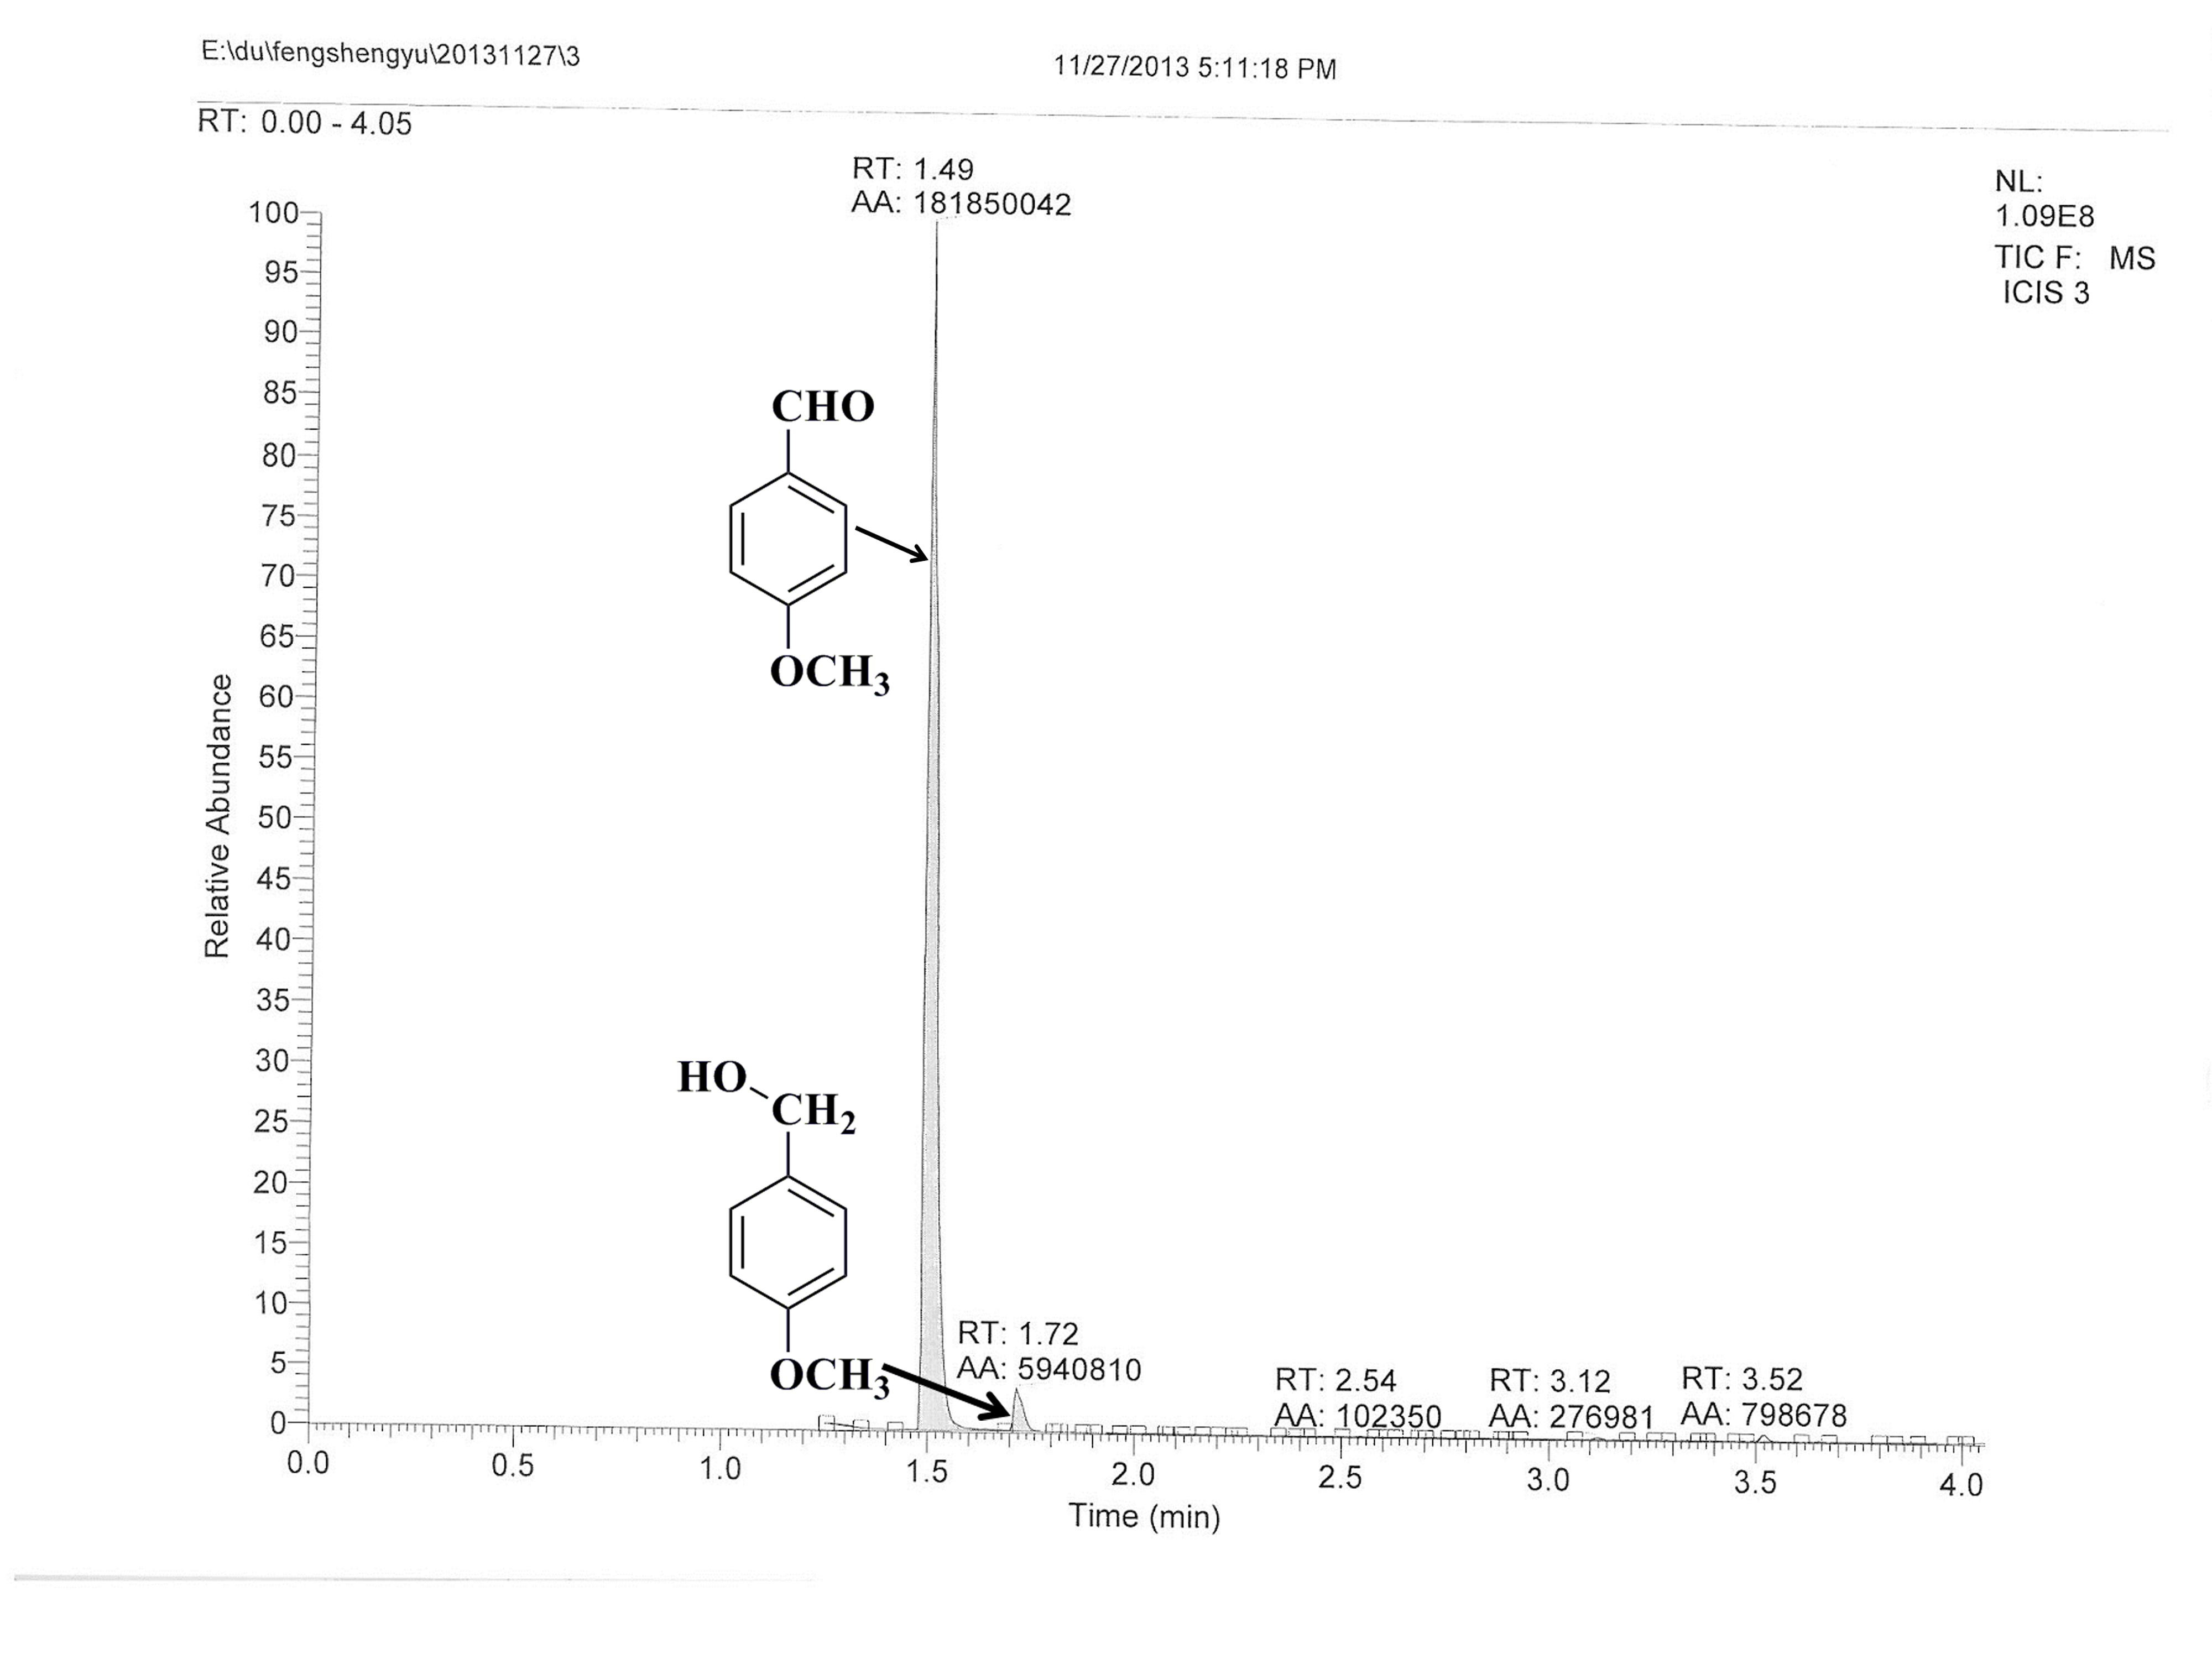

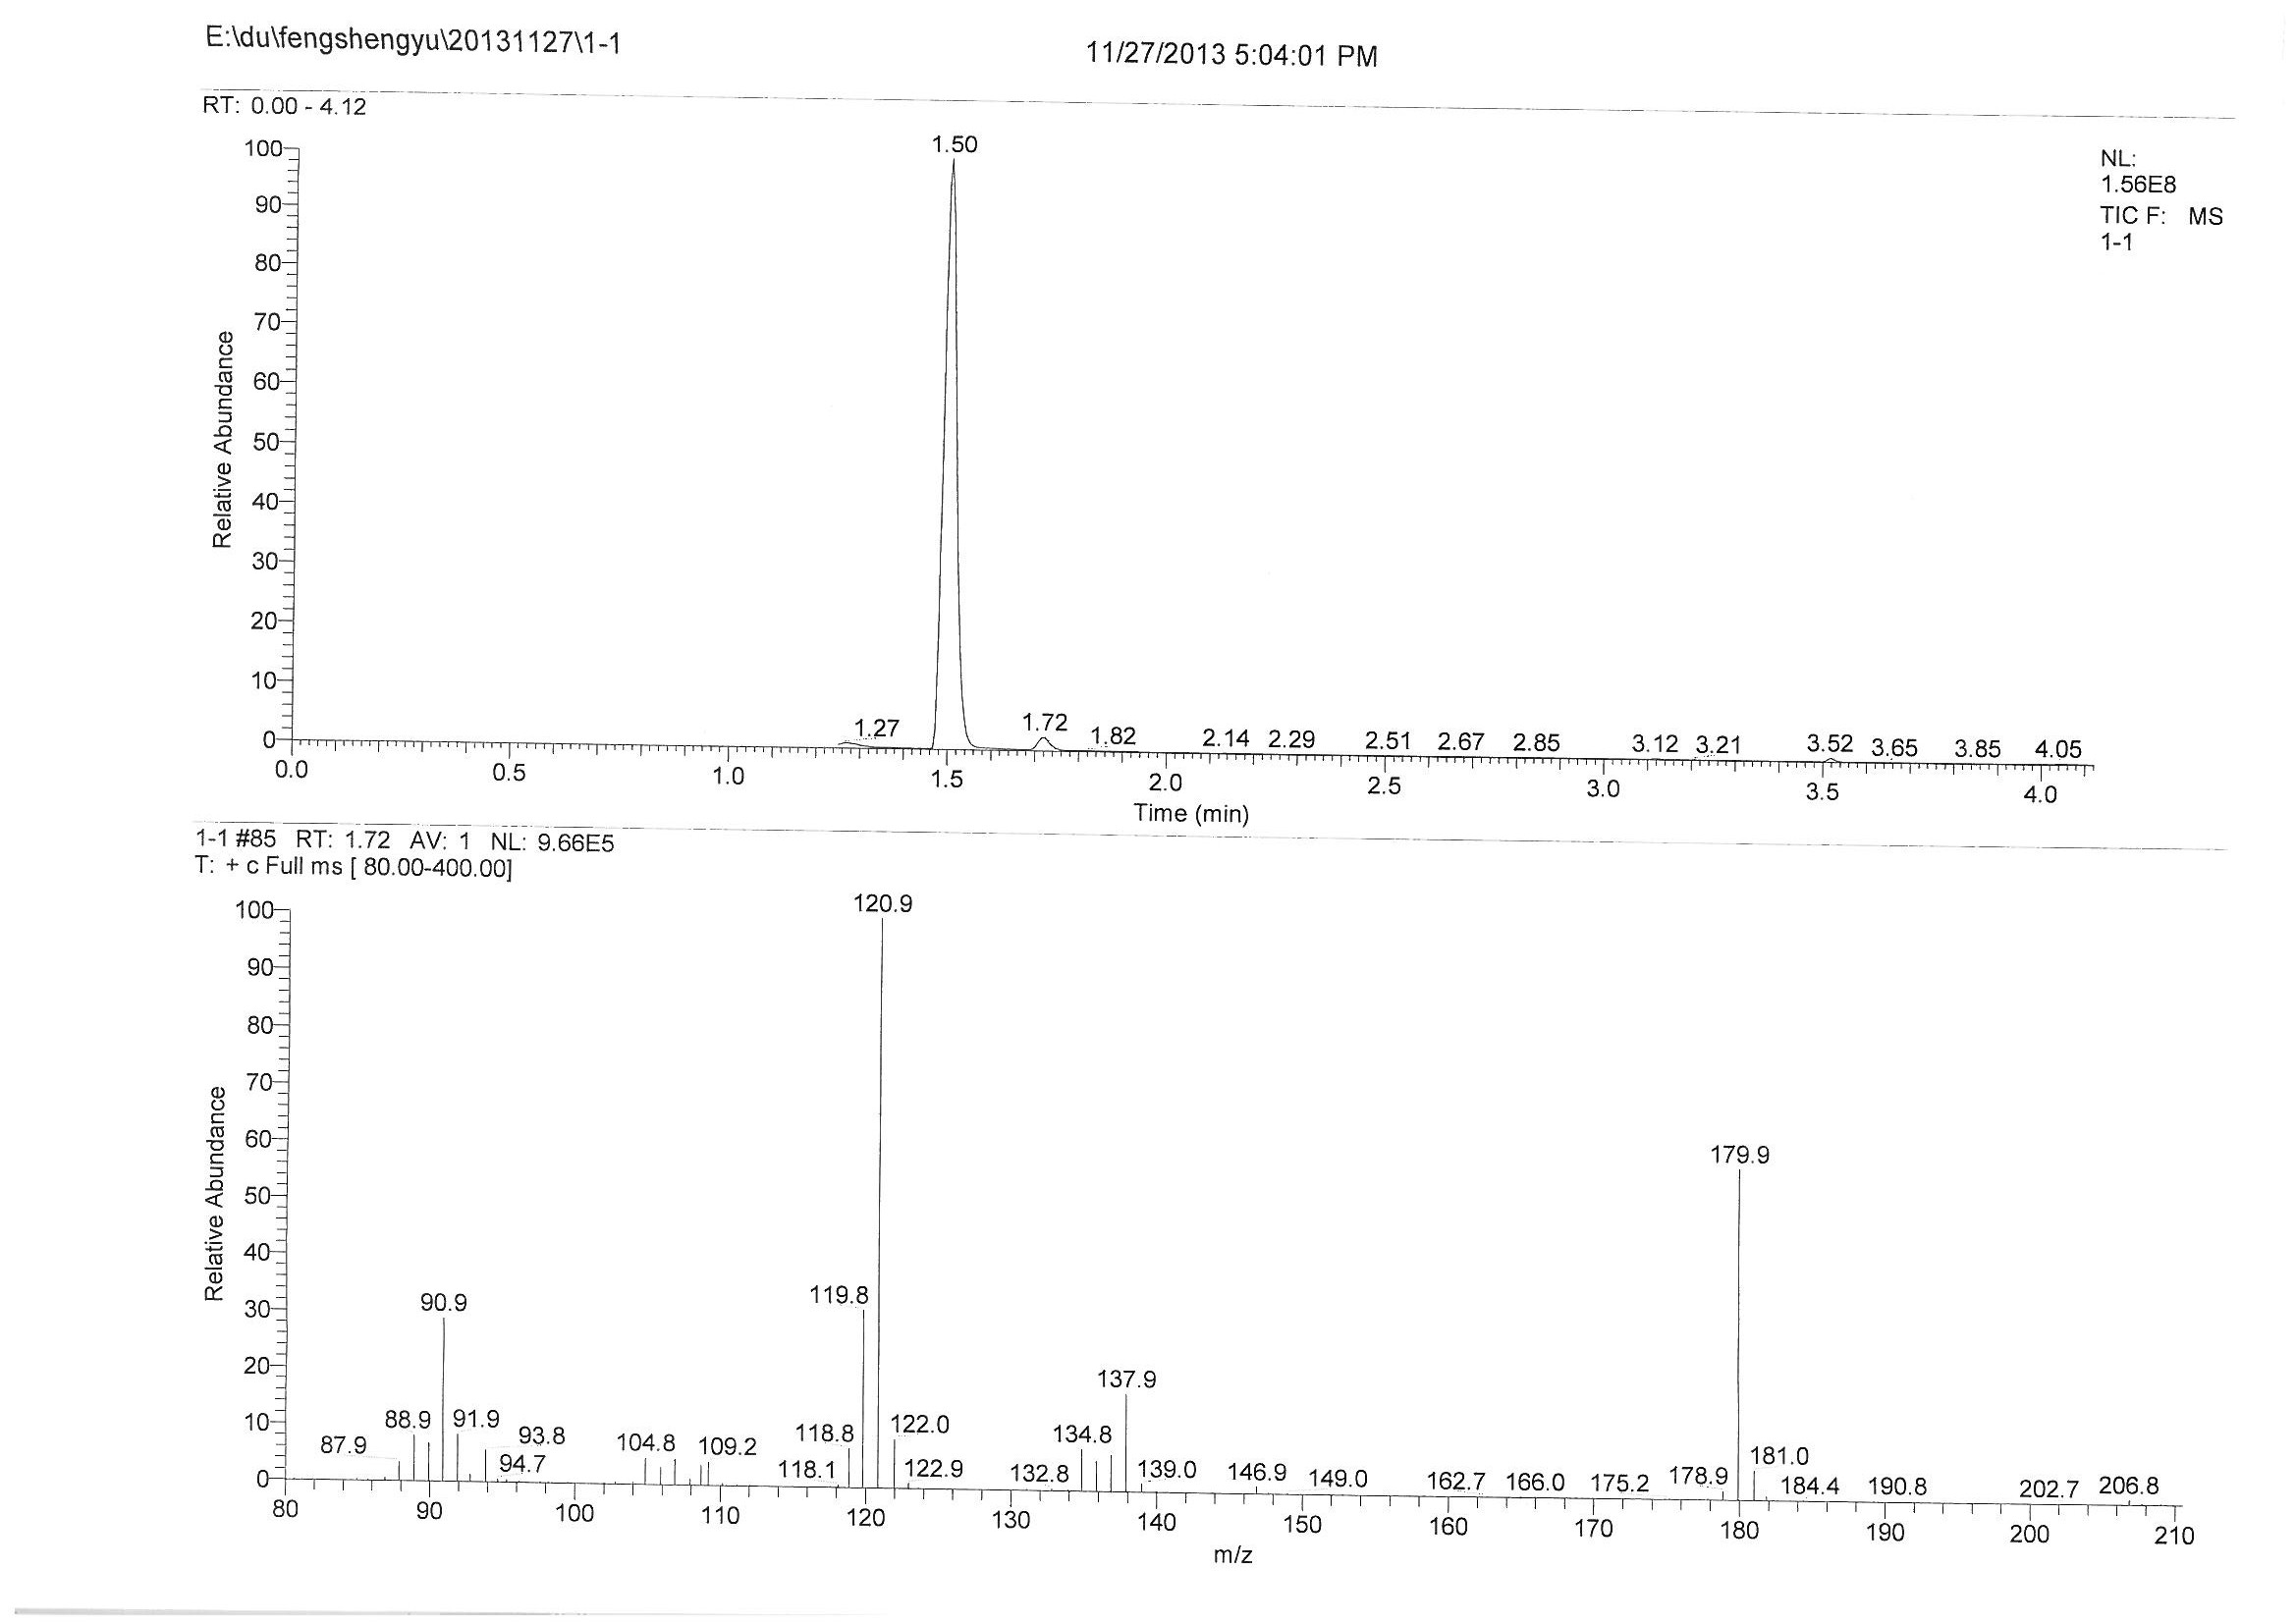


Fig-5 GC-MS analysis of 4-Methoxybenzyl alcohol Minisci method oxidation: (SEVENTH RUN)
